# Supplementary material
Source: PubMed Central journal article supplement (PMC4666306)

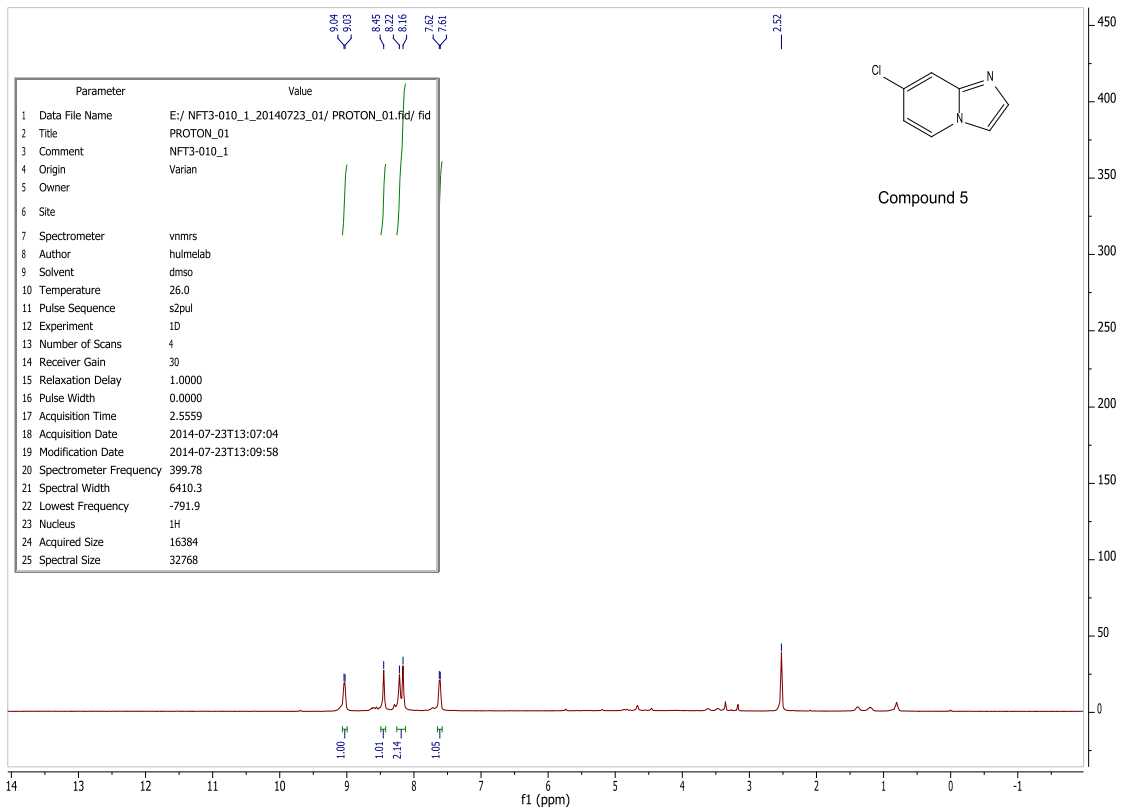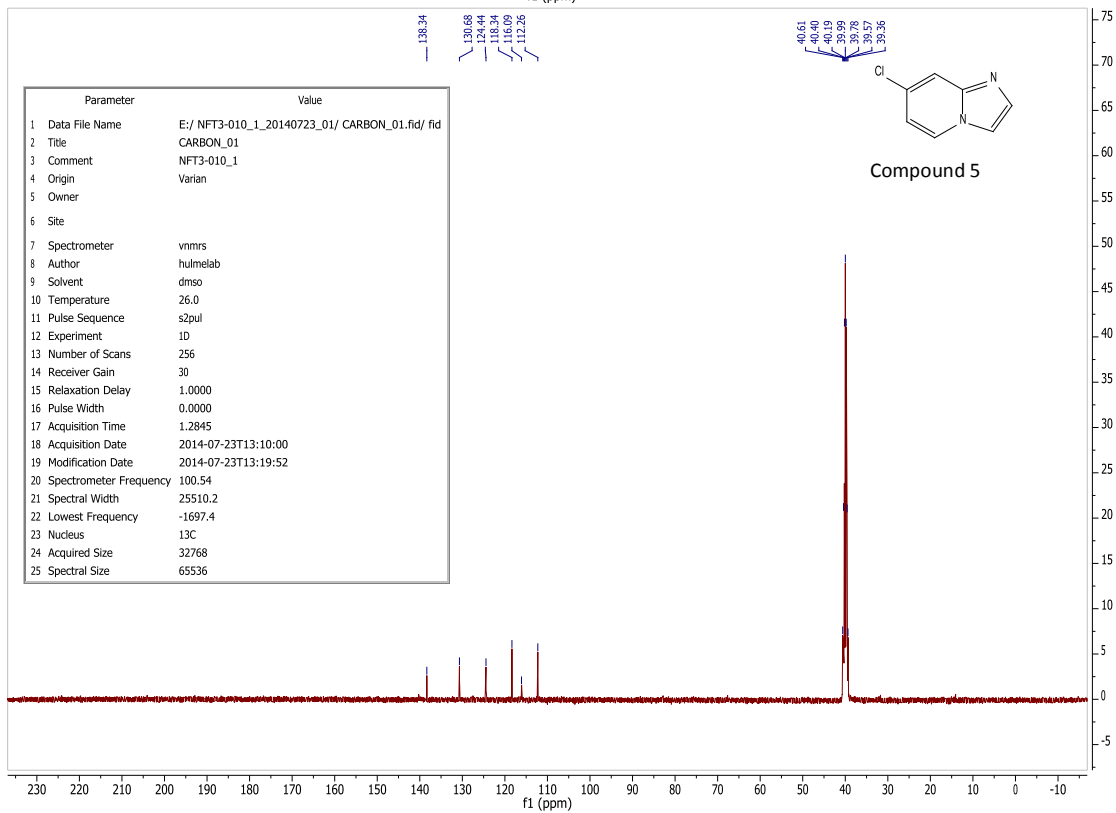

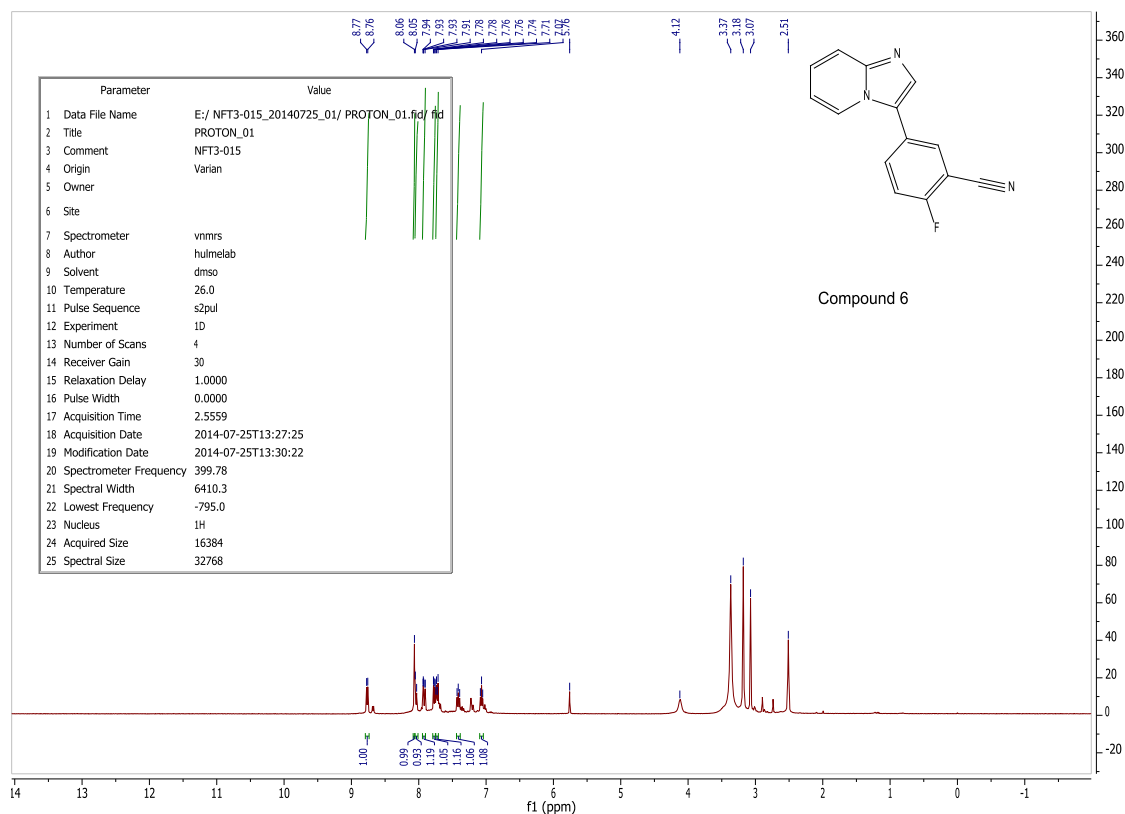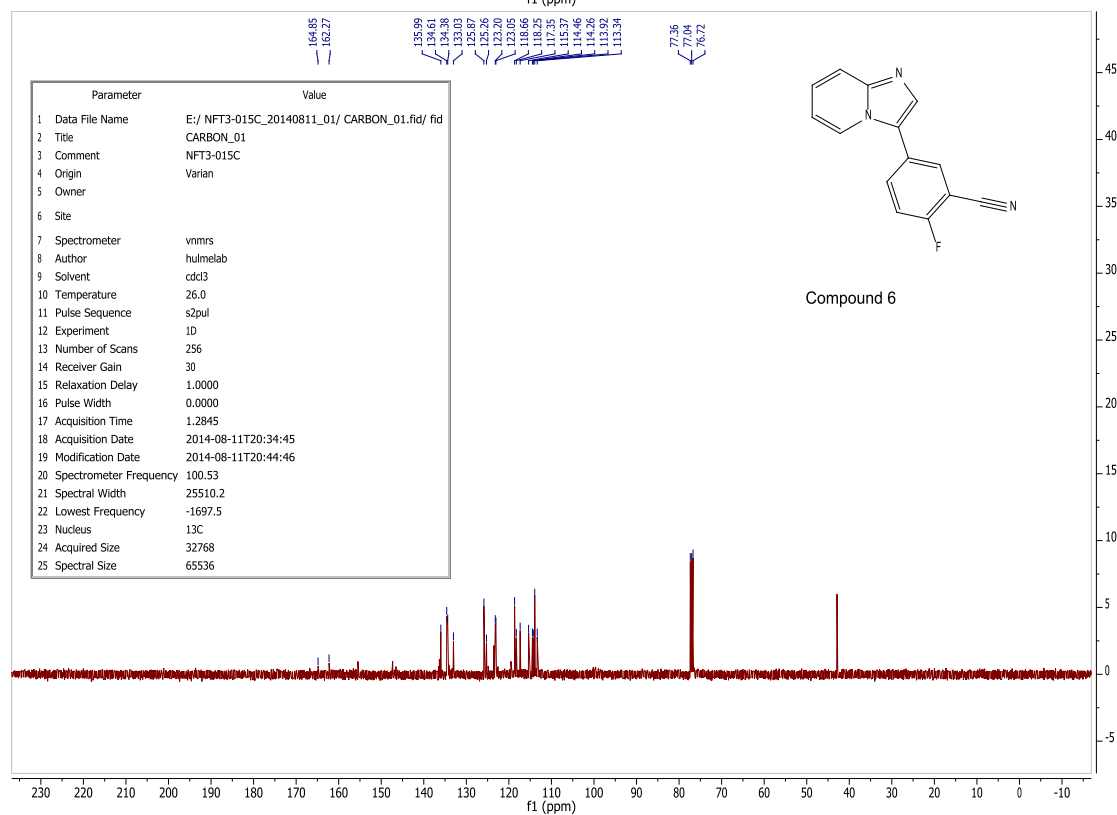

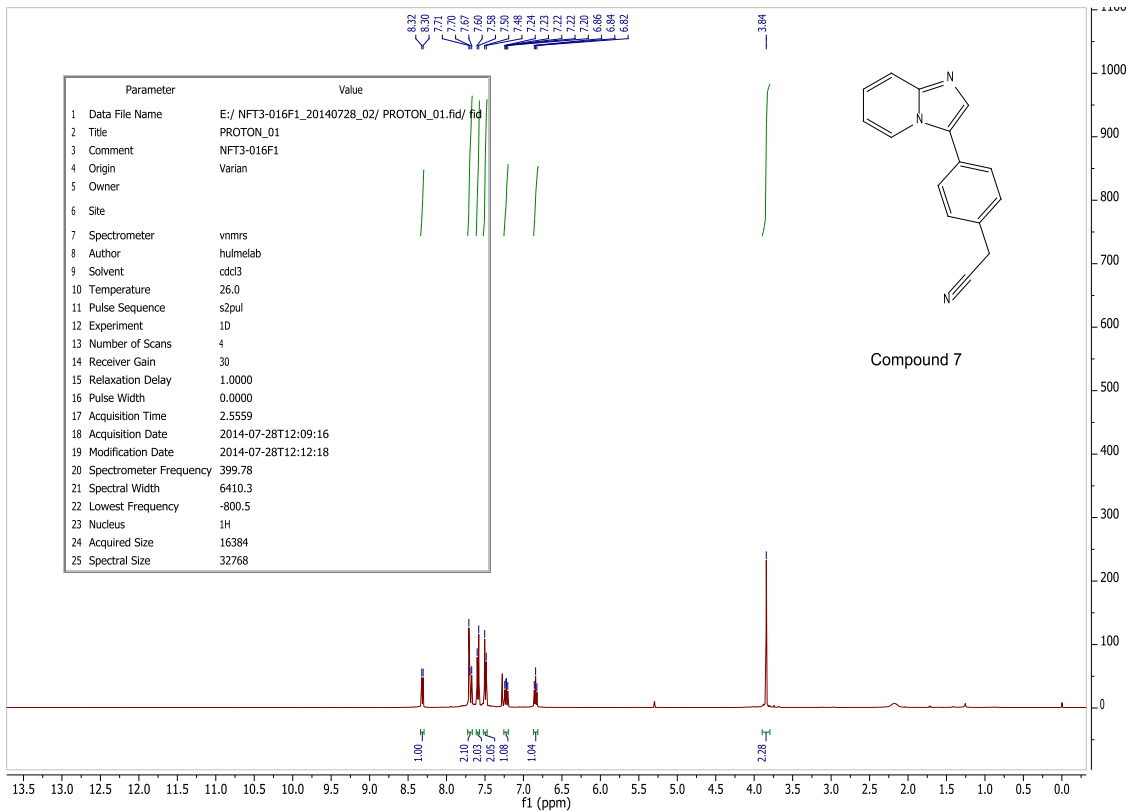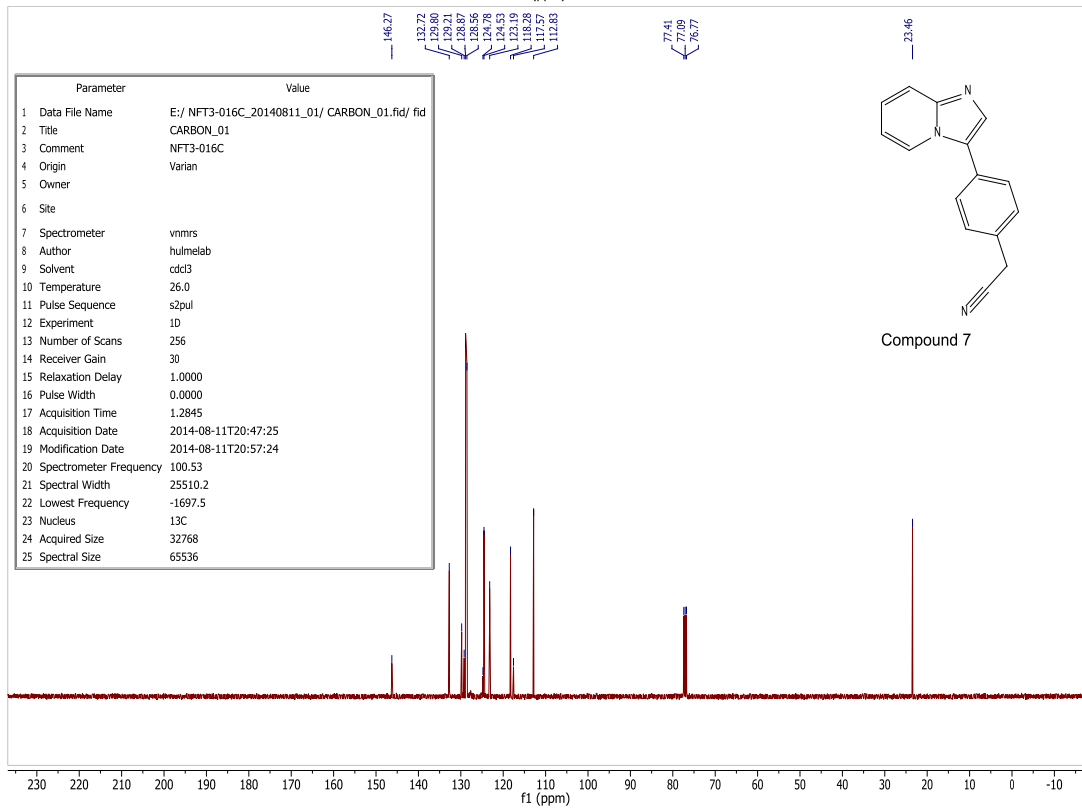

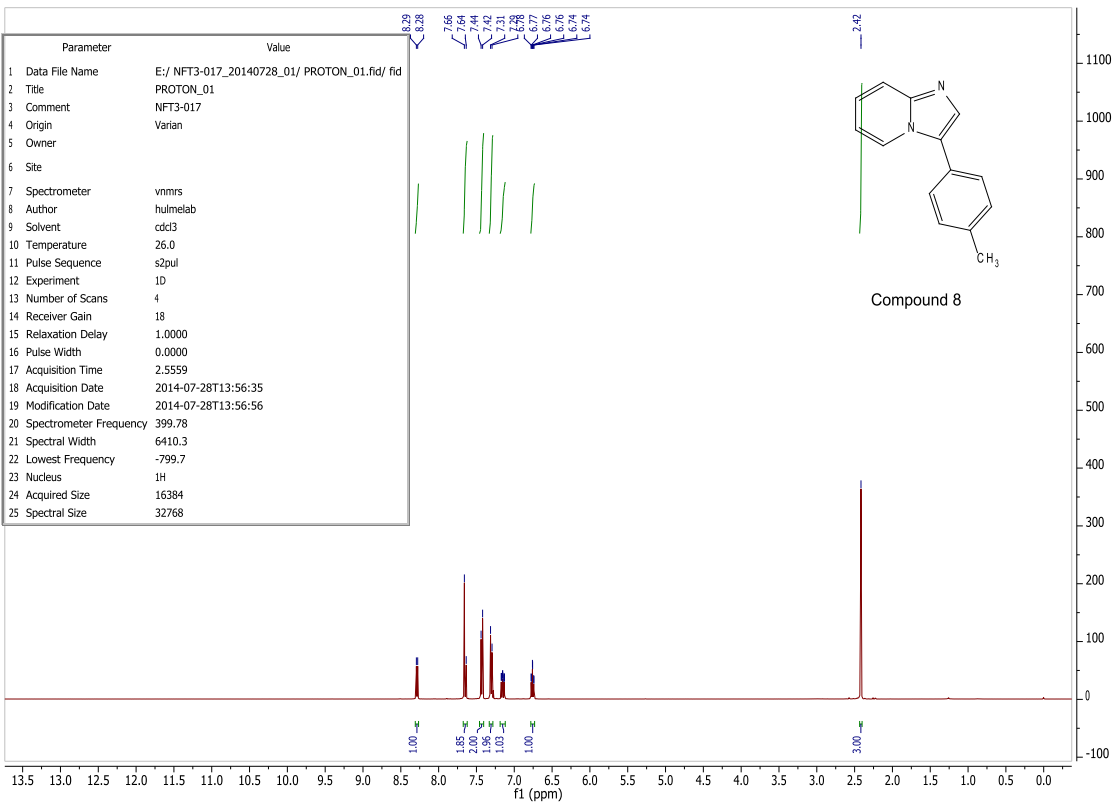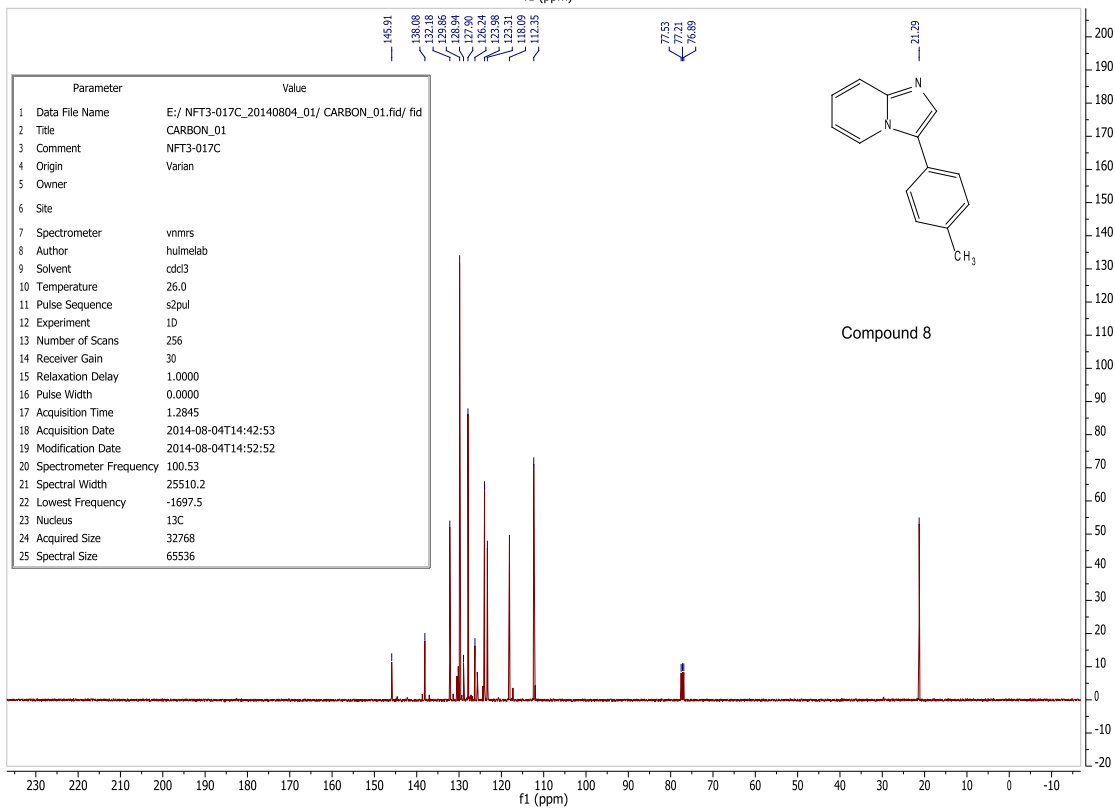

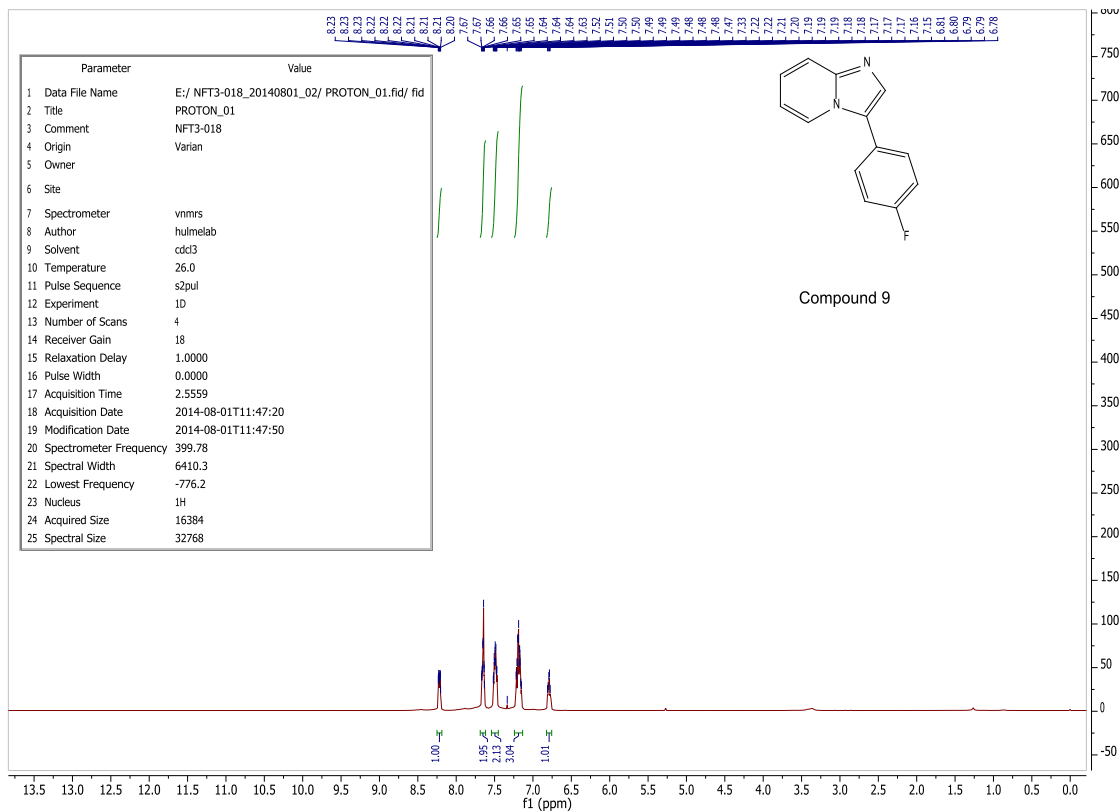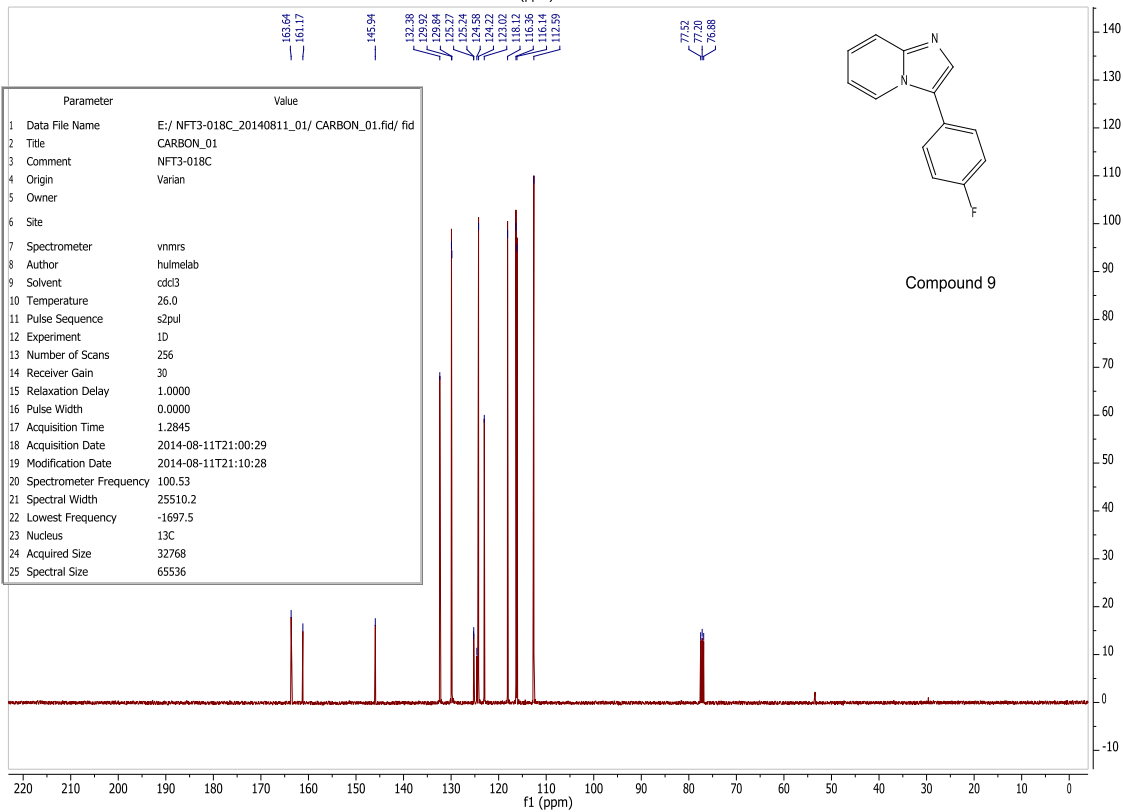

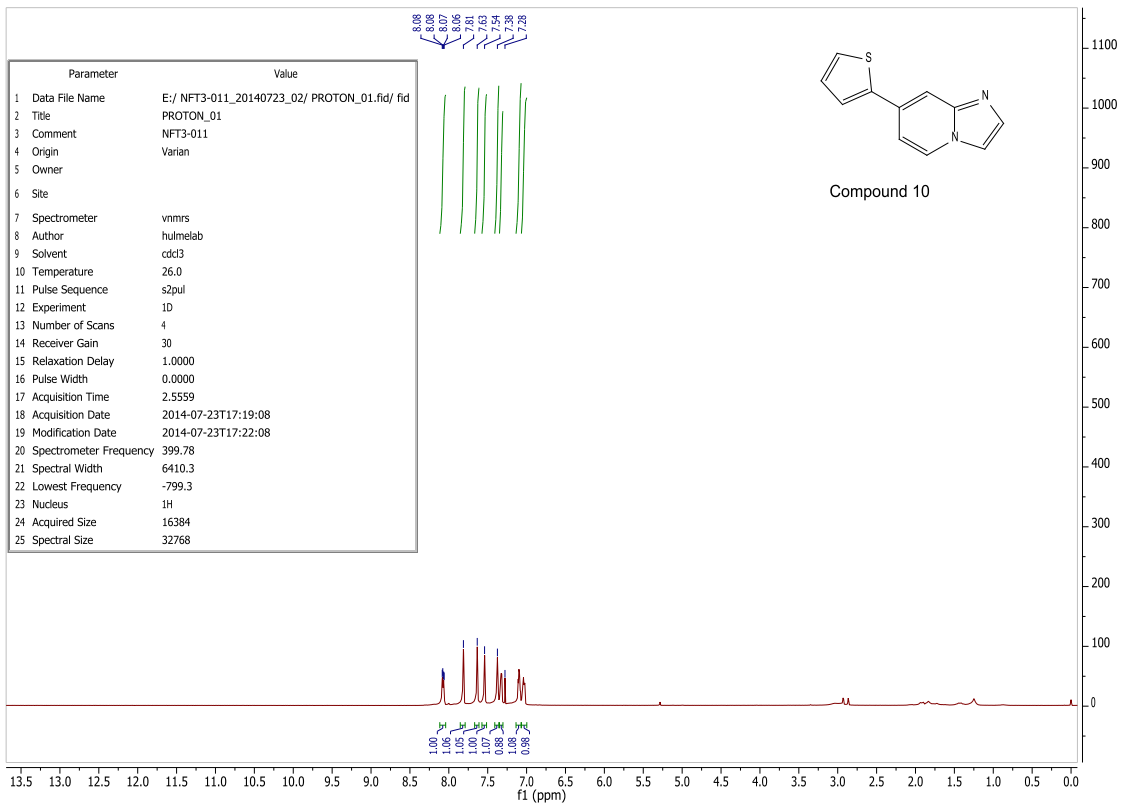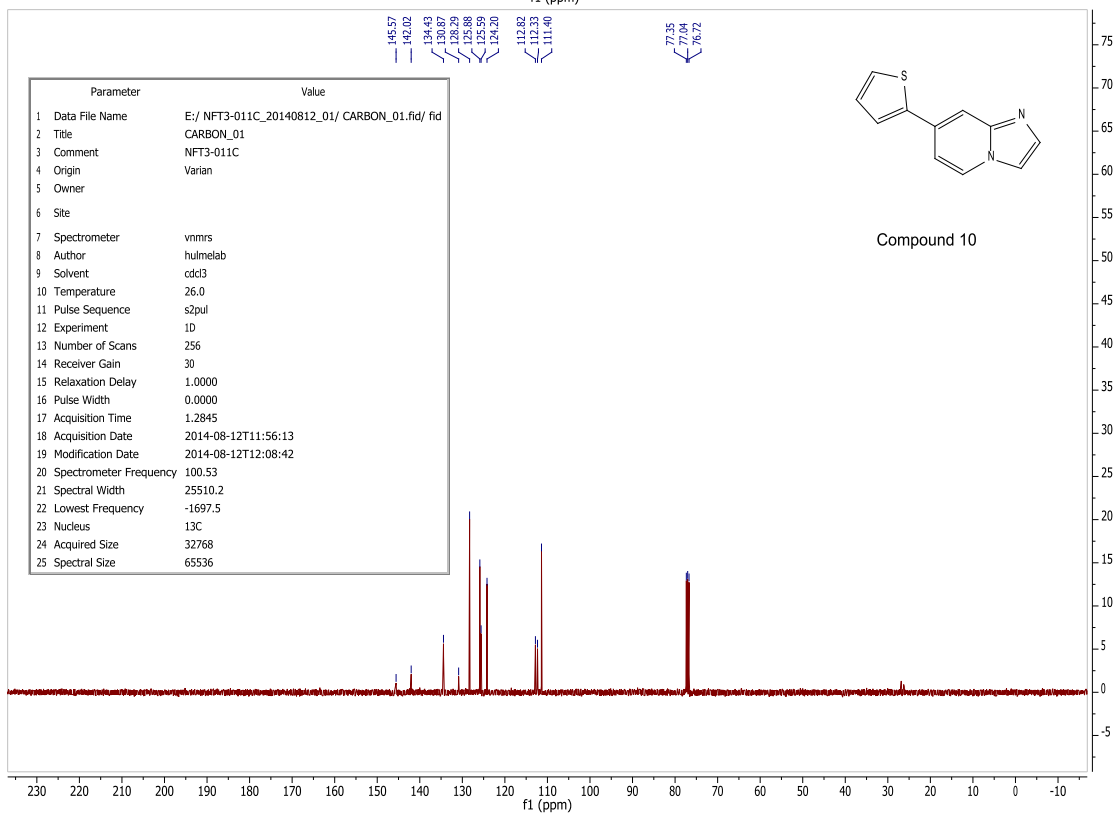

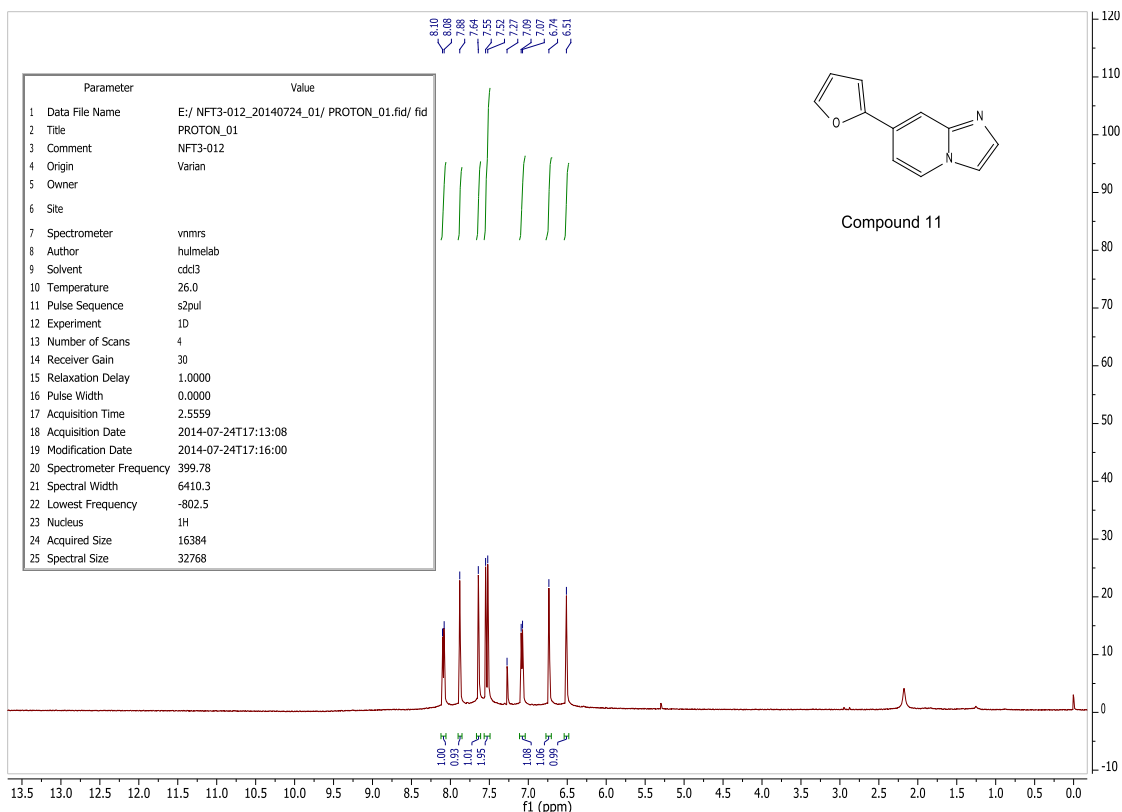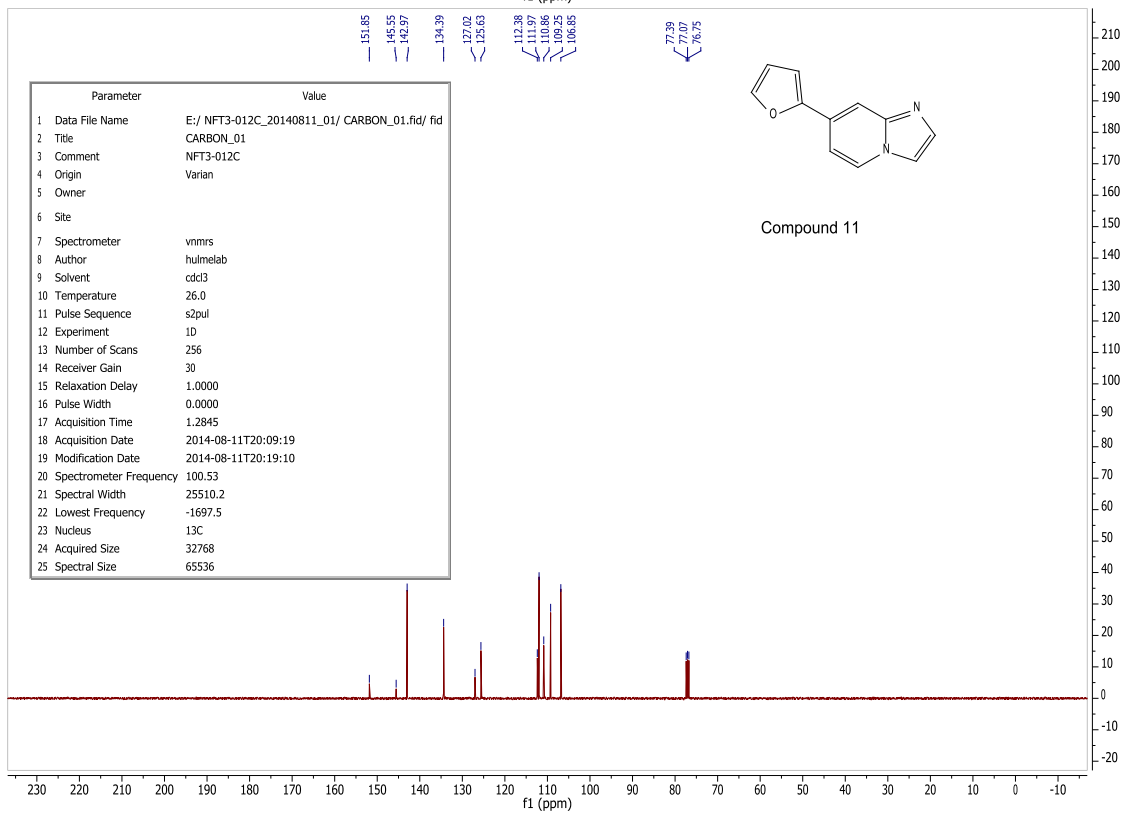

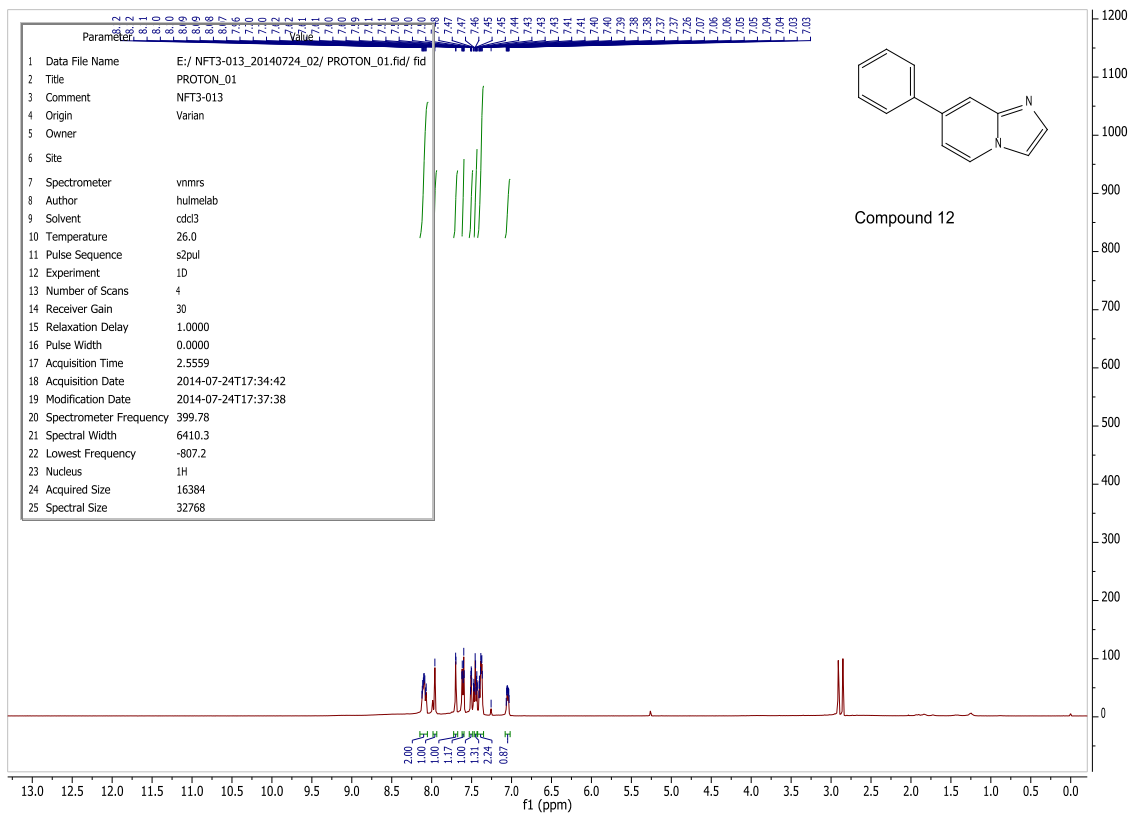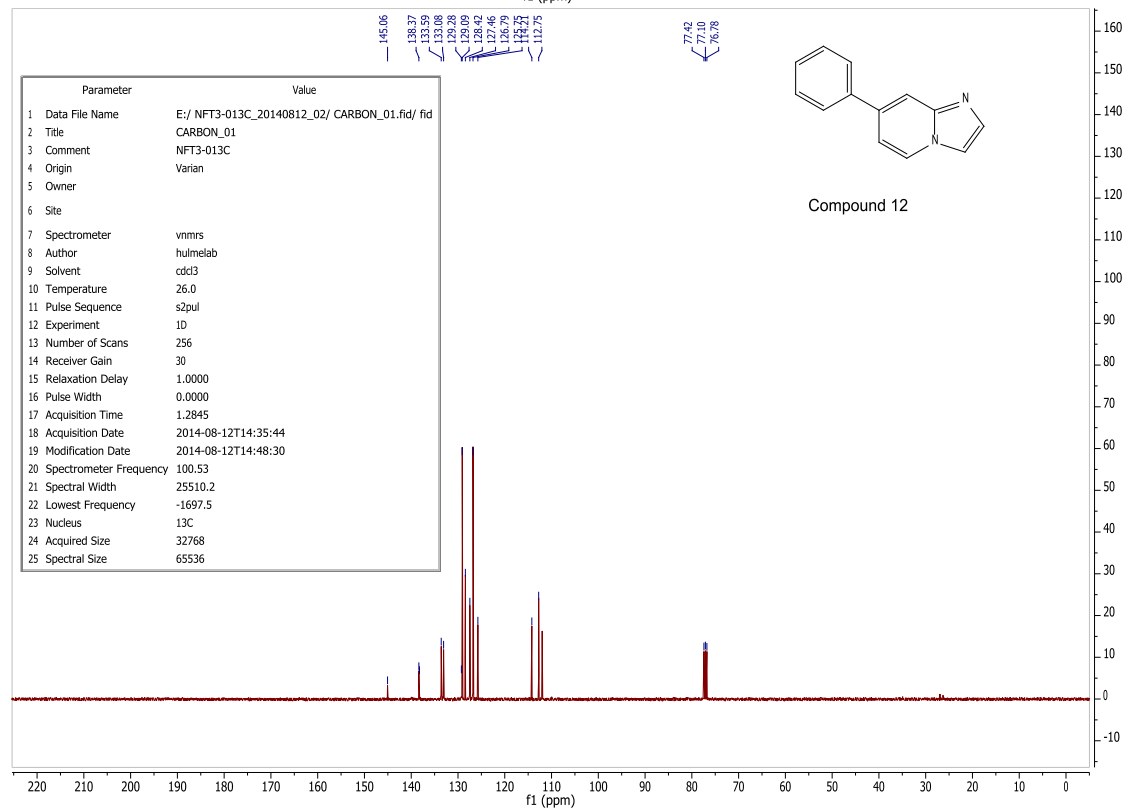



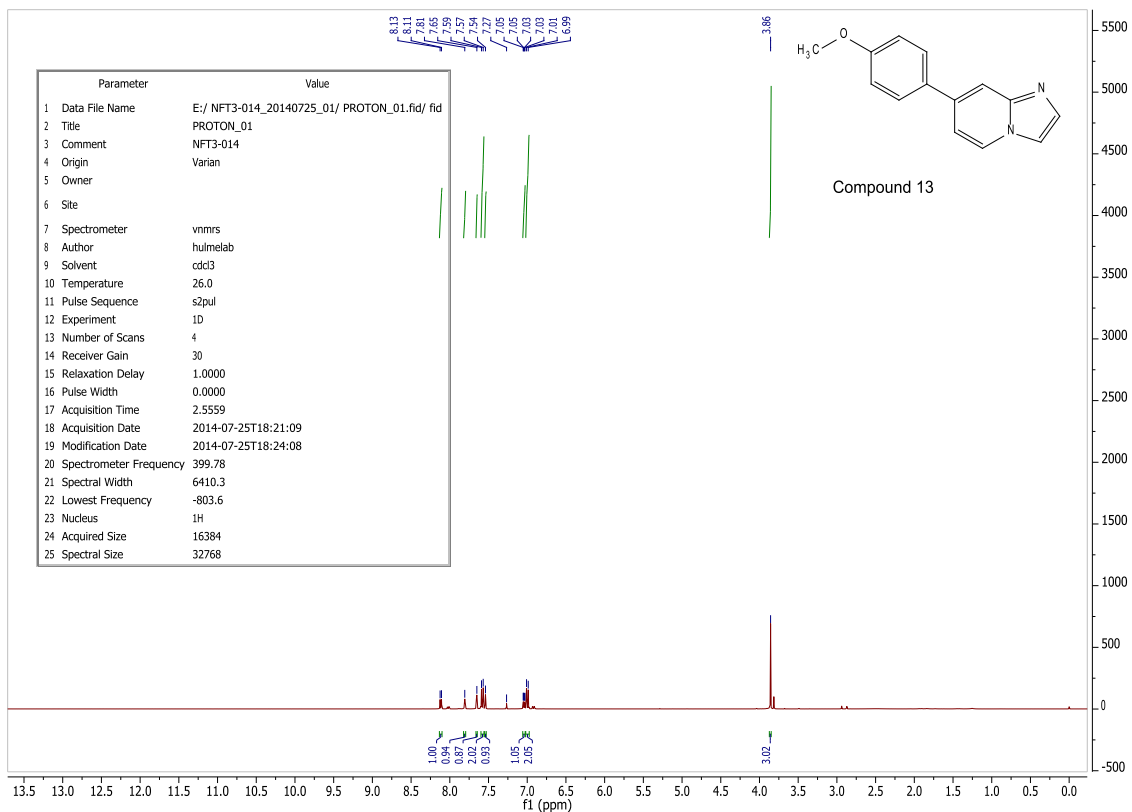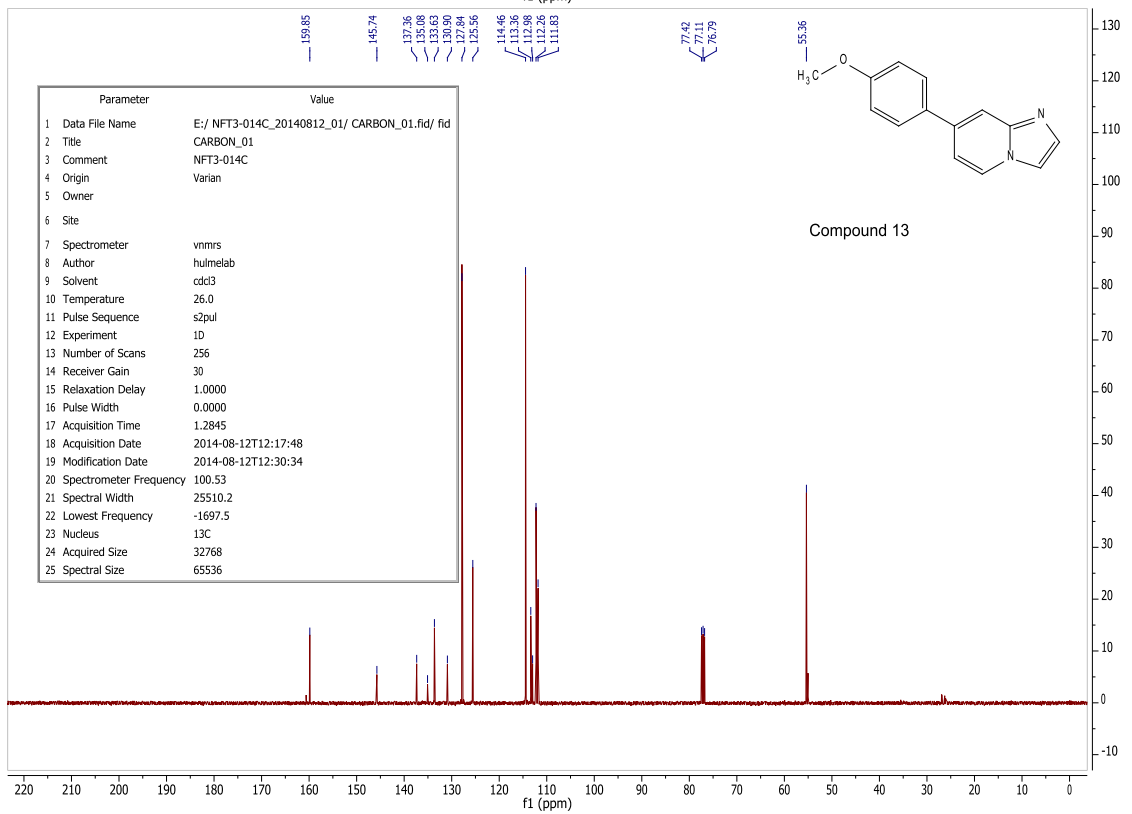

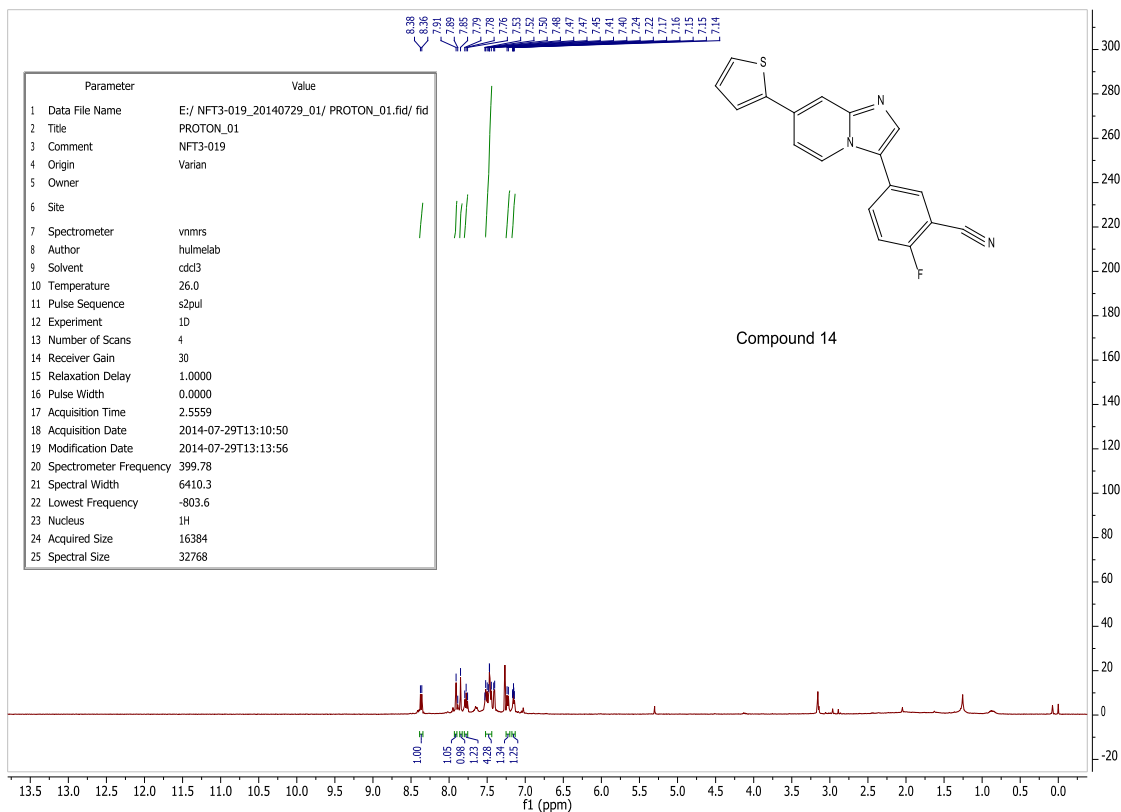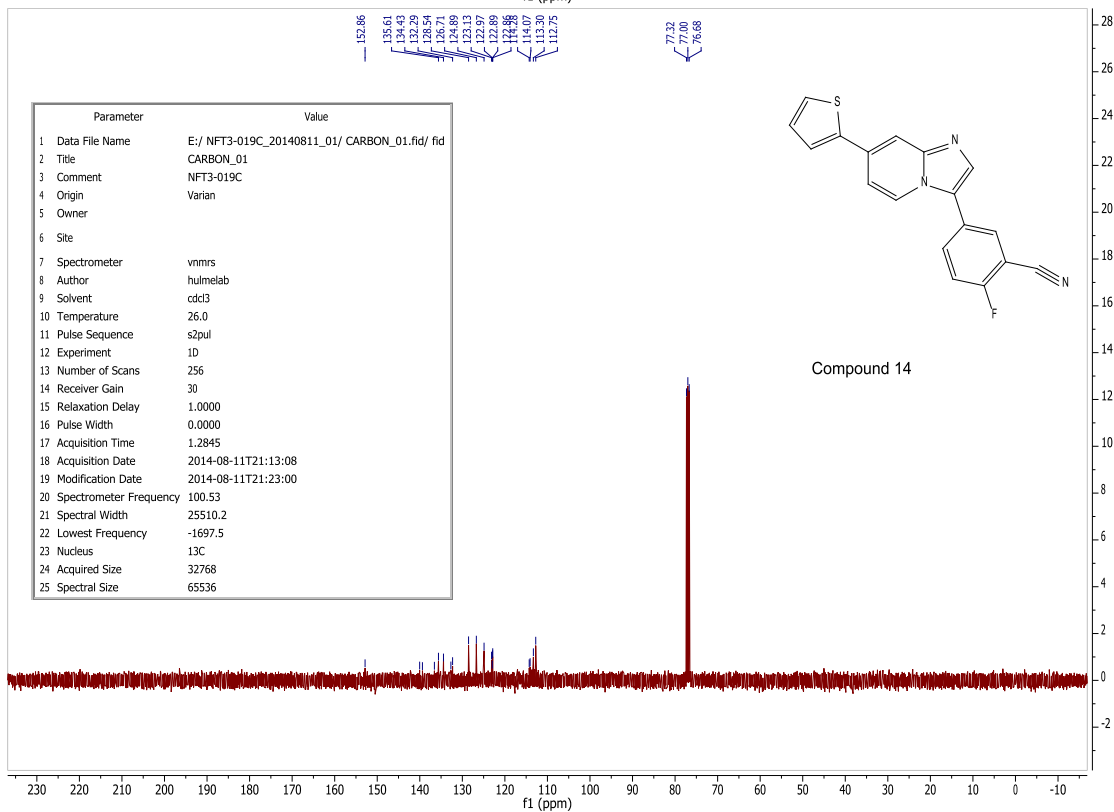

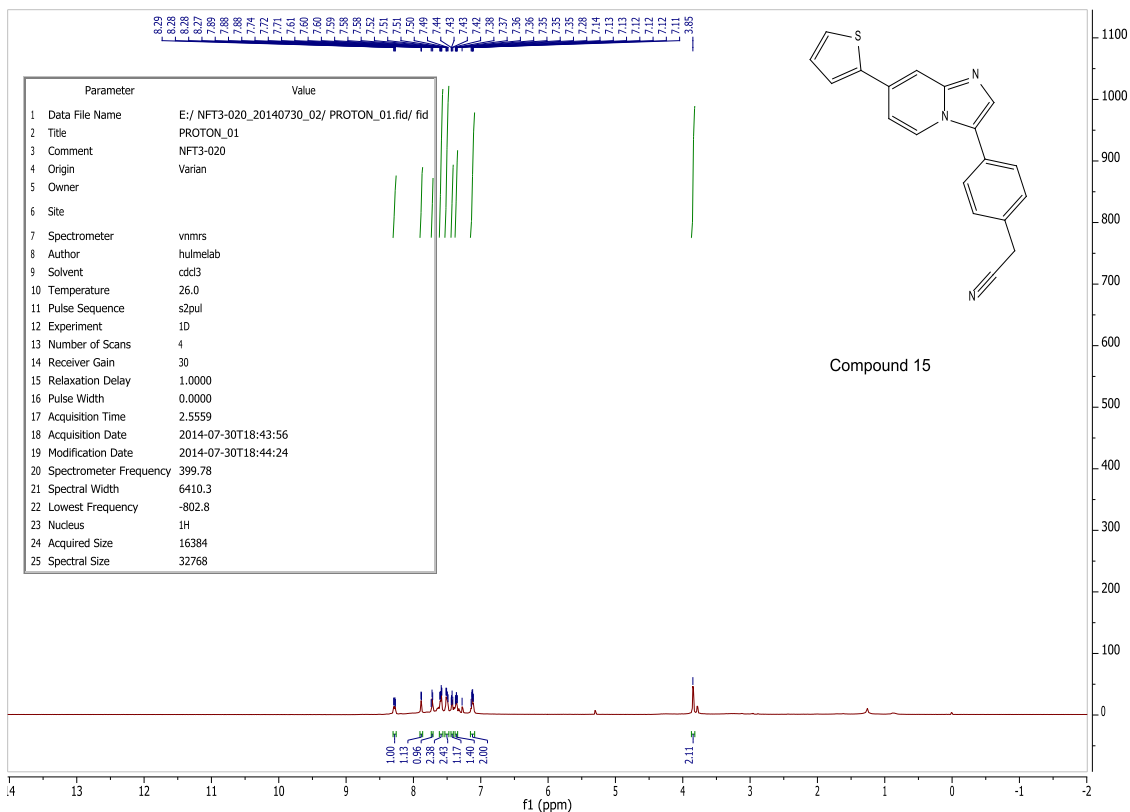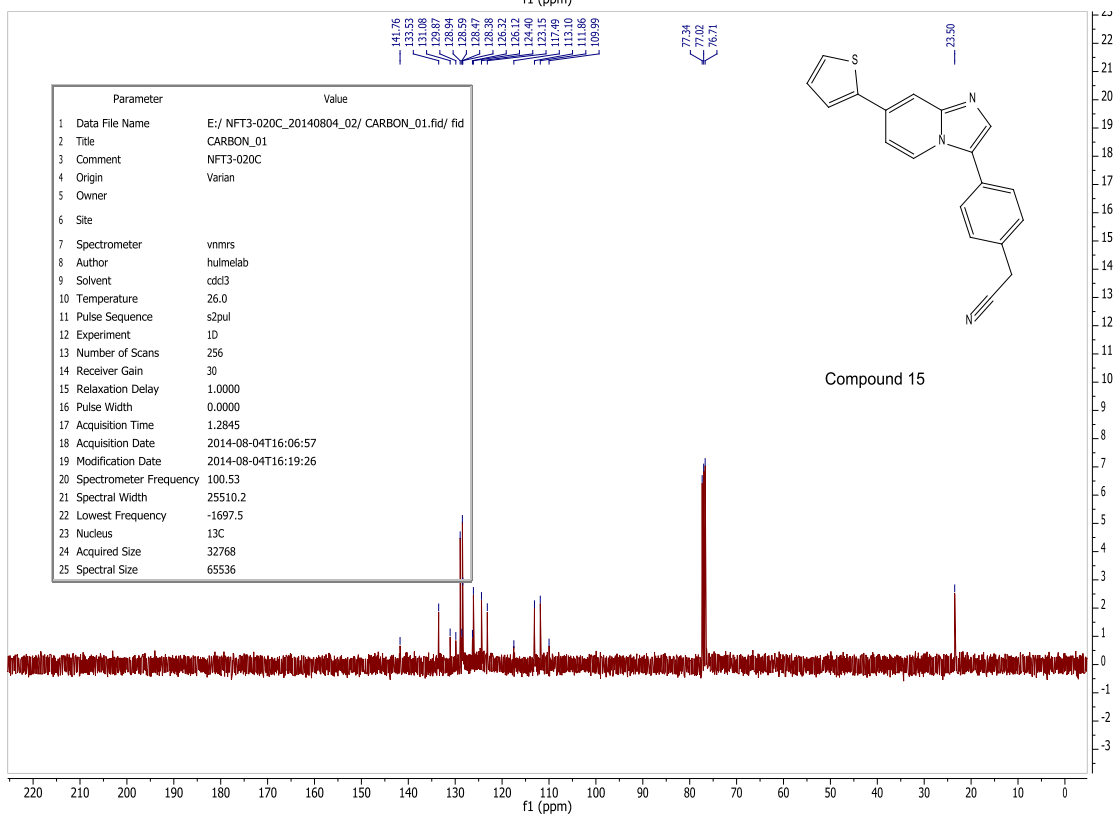

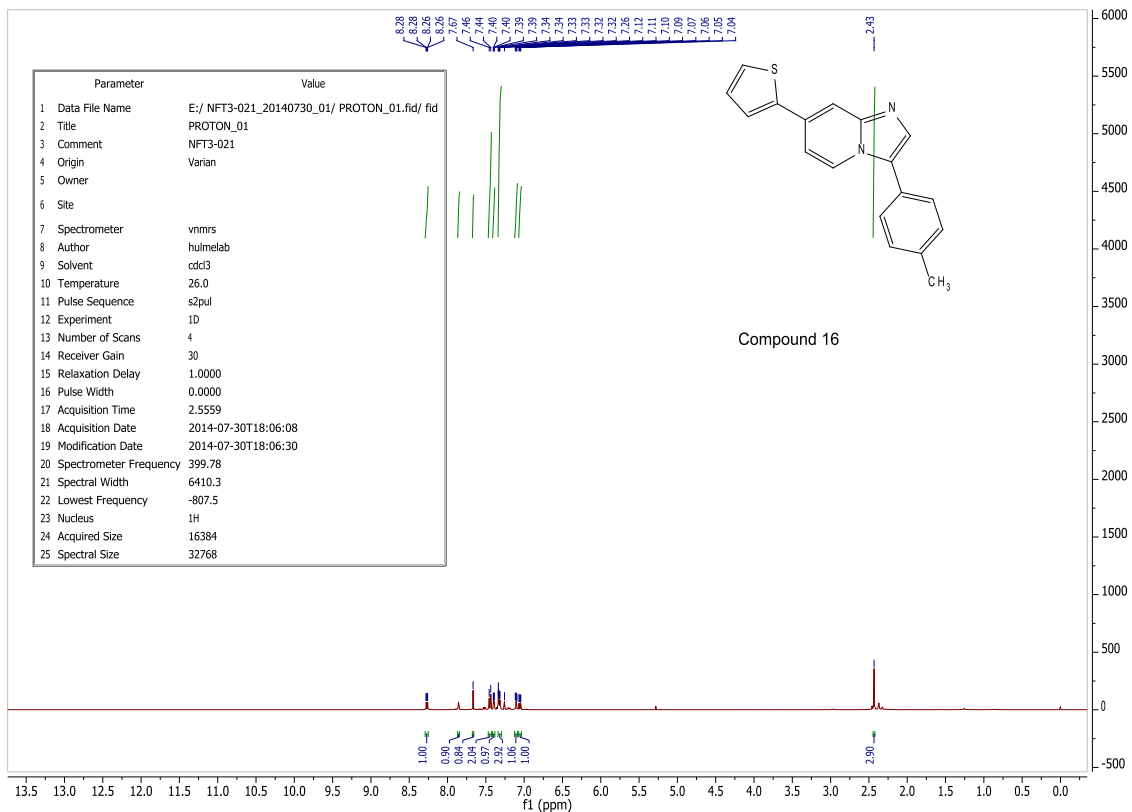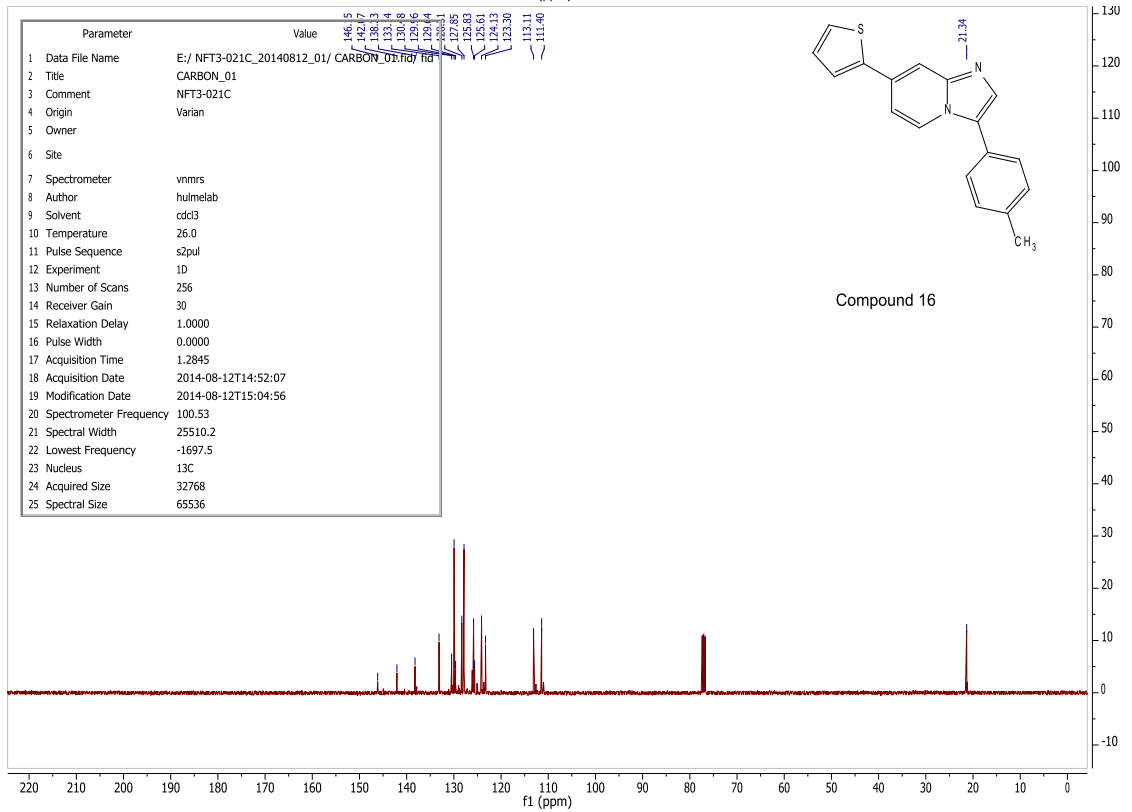

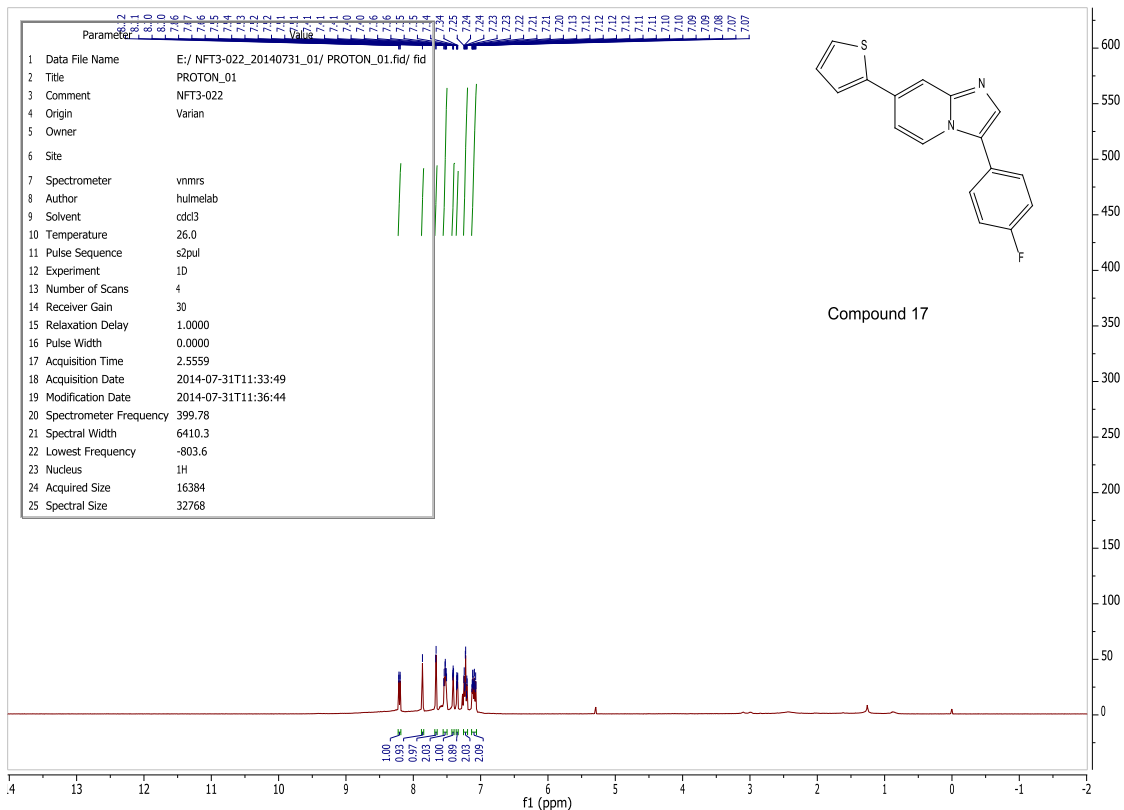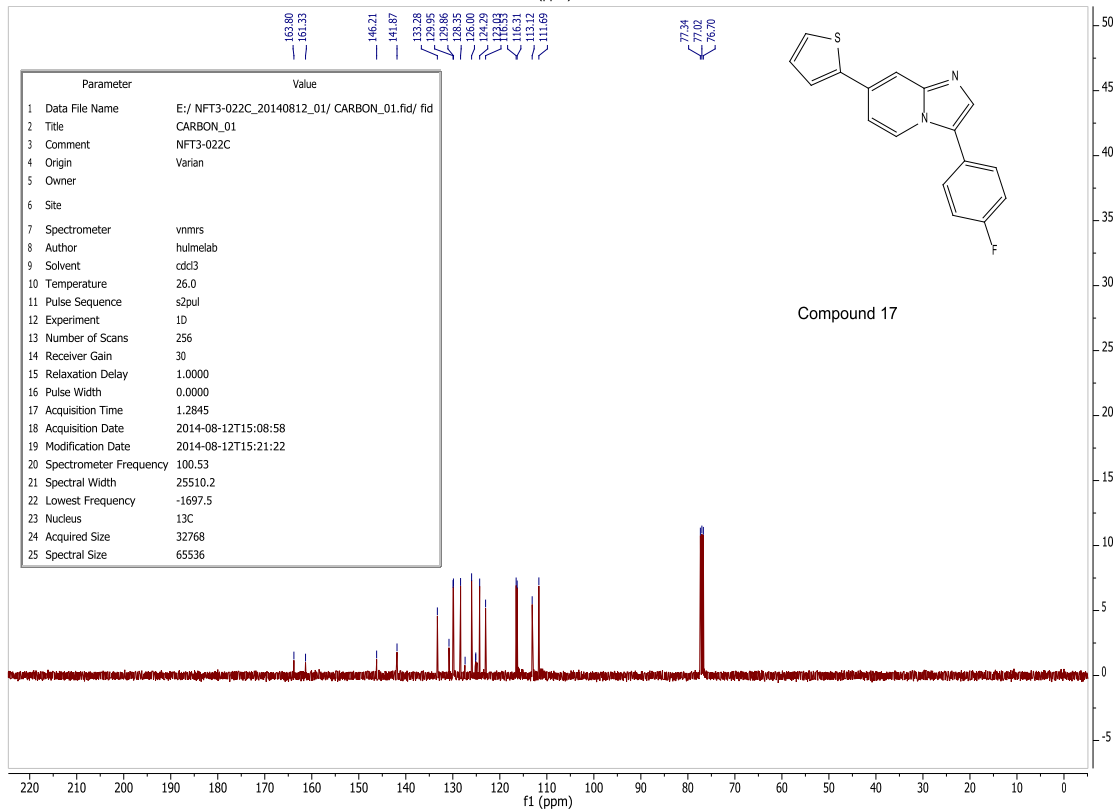

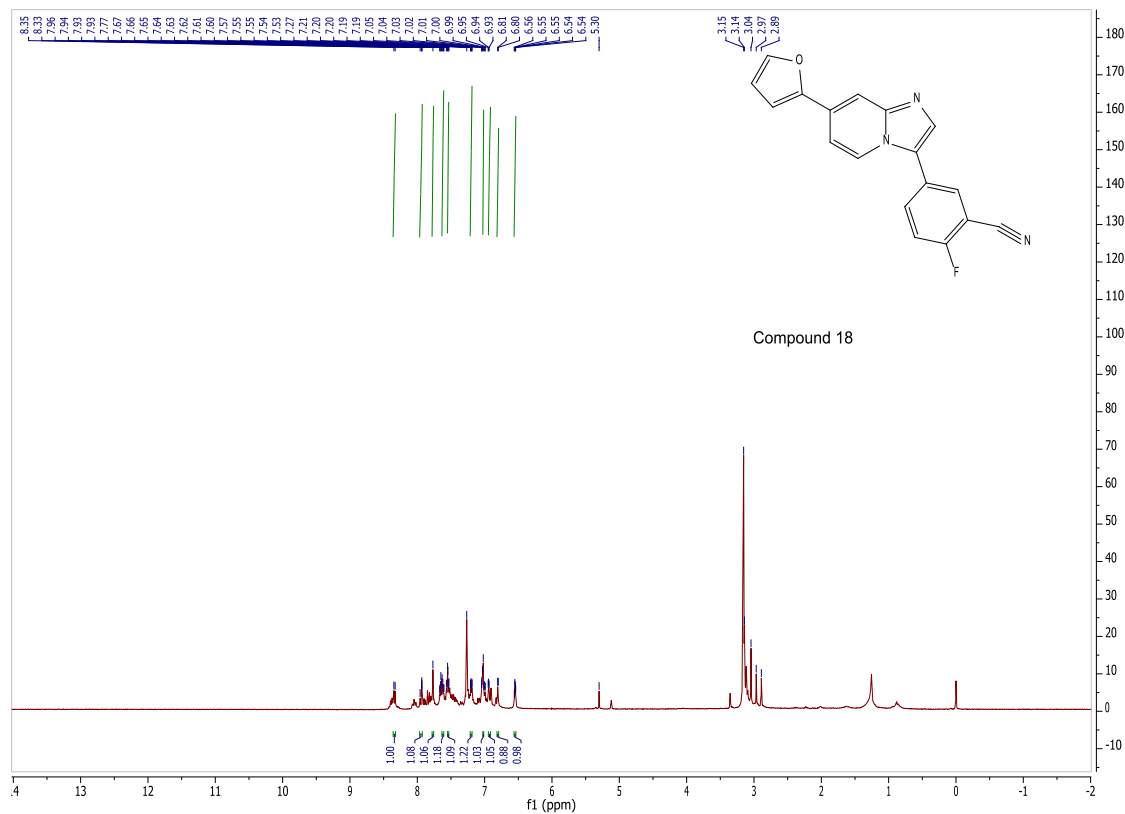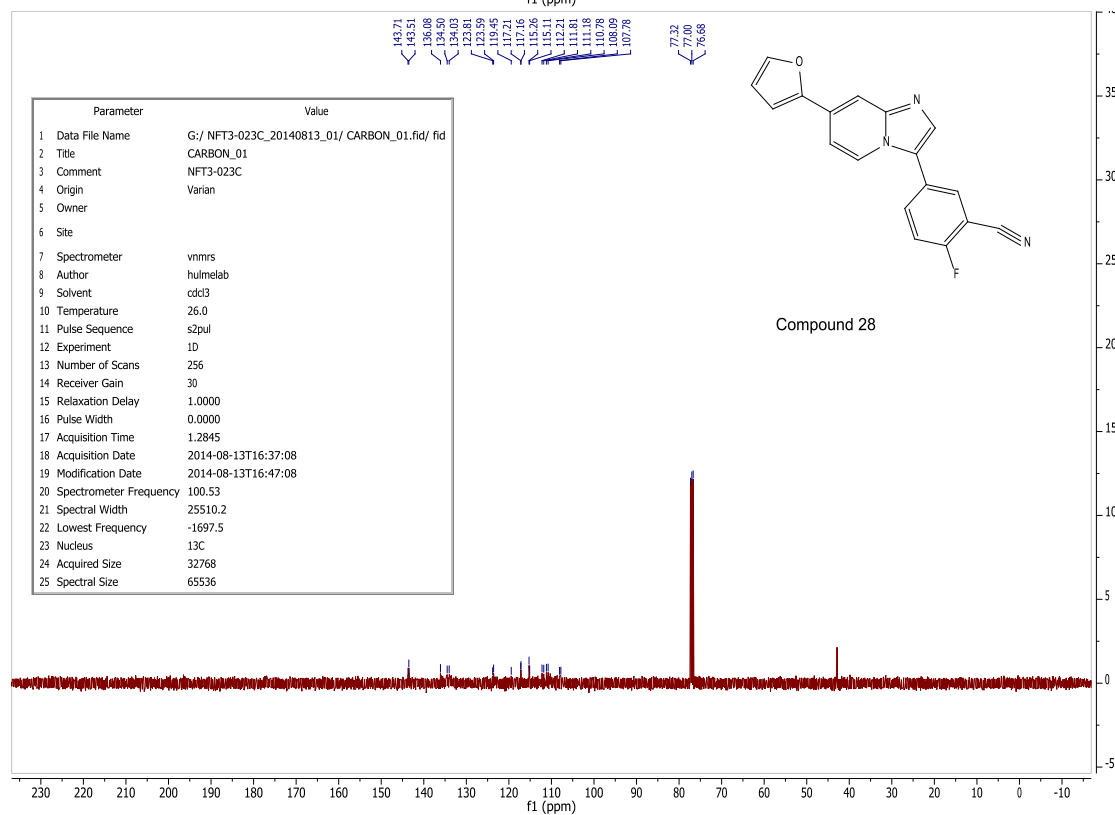

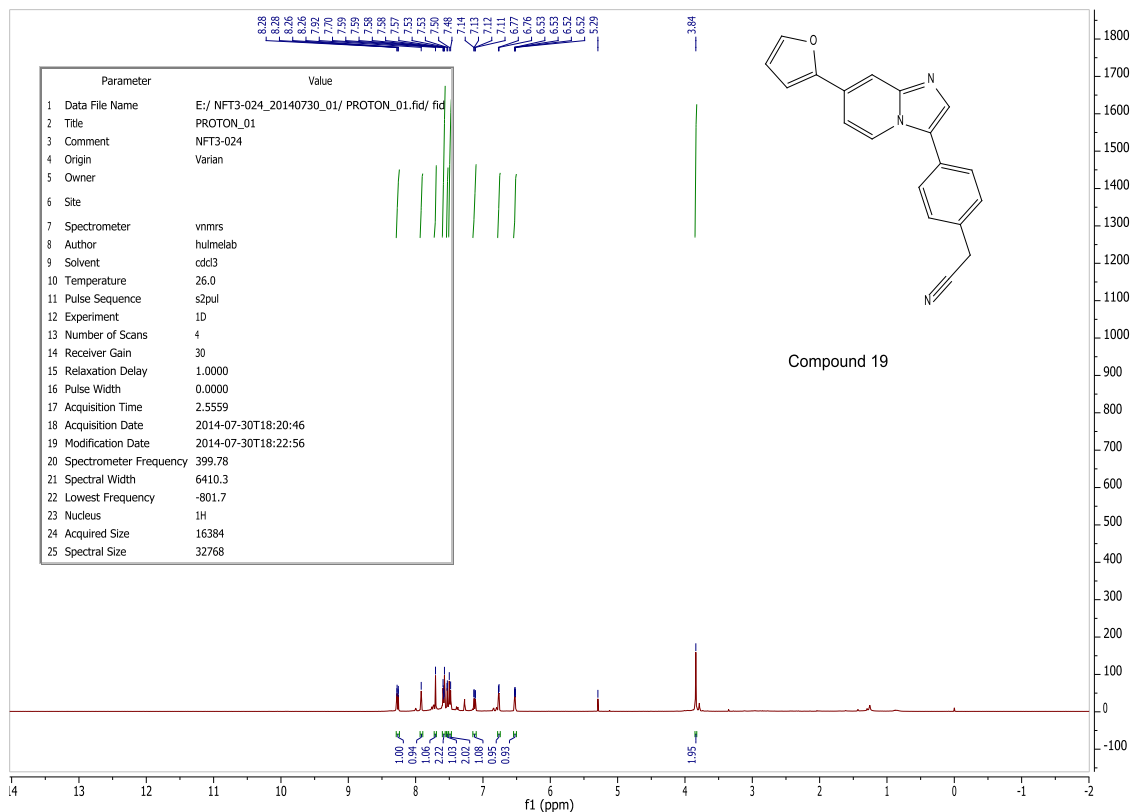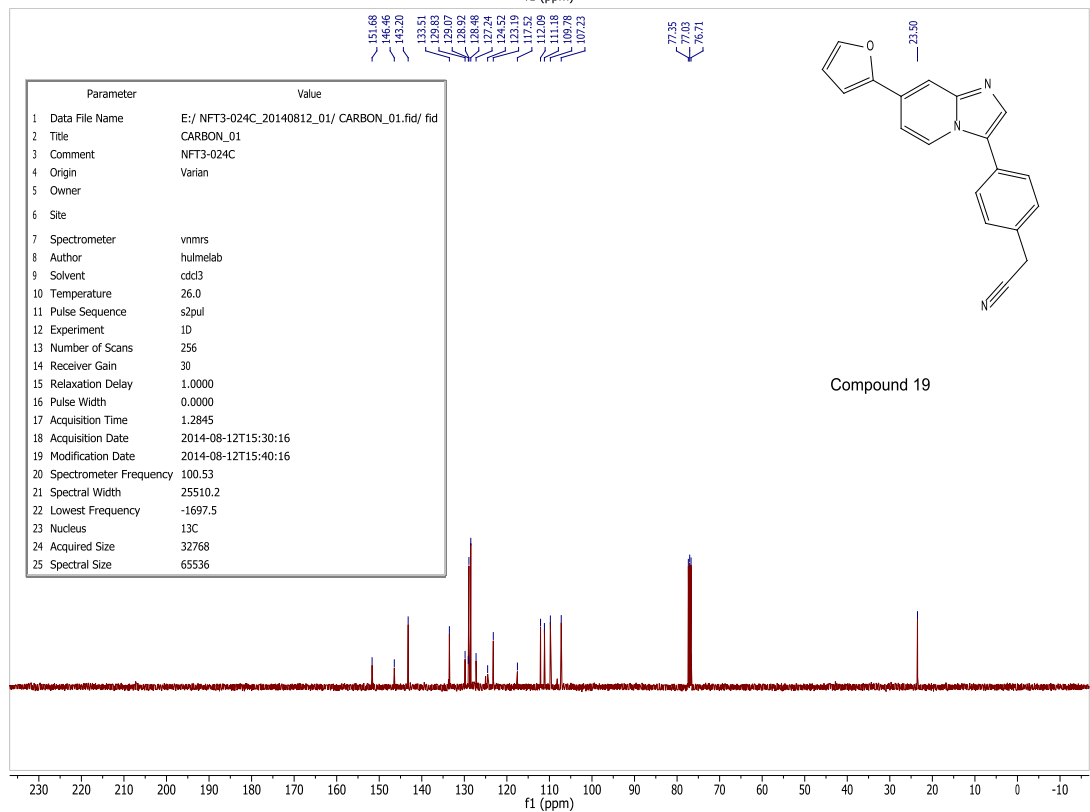

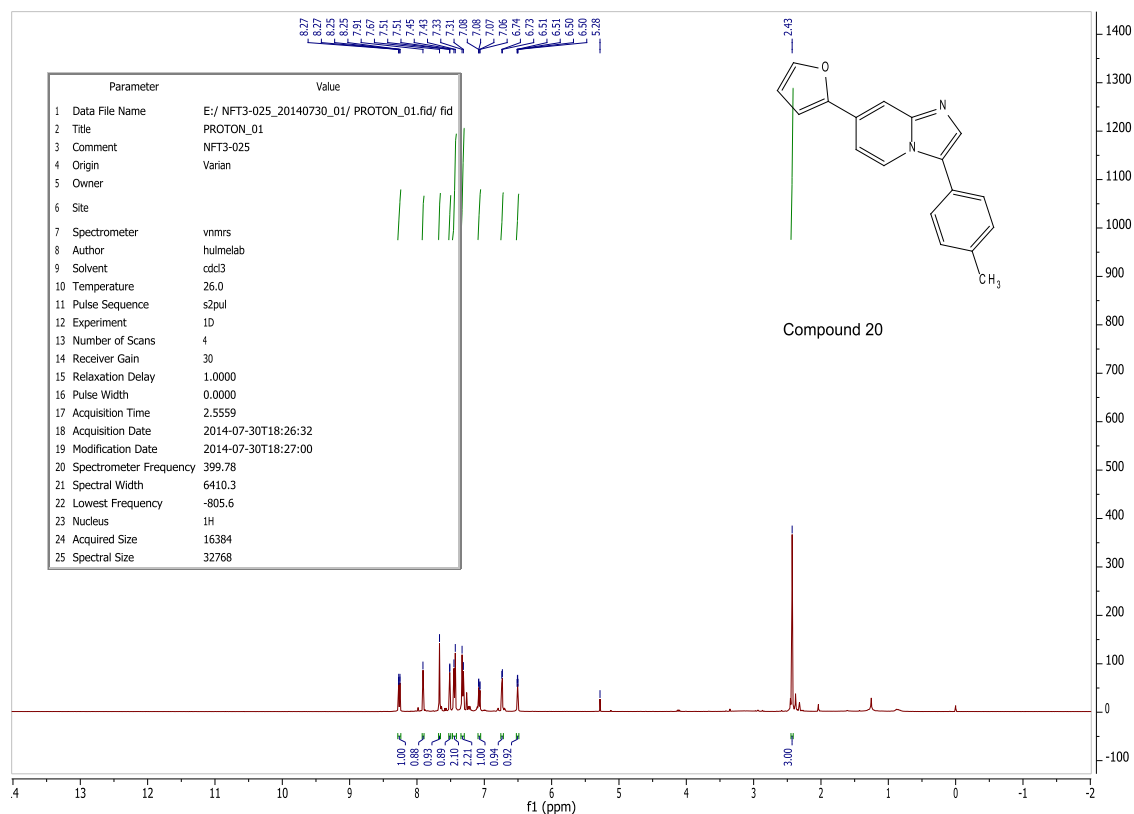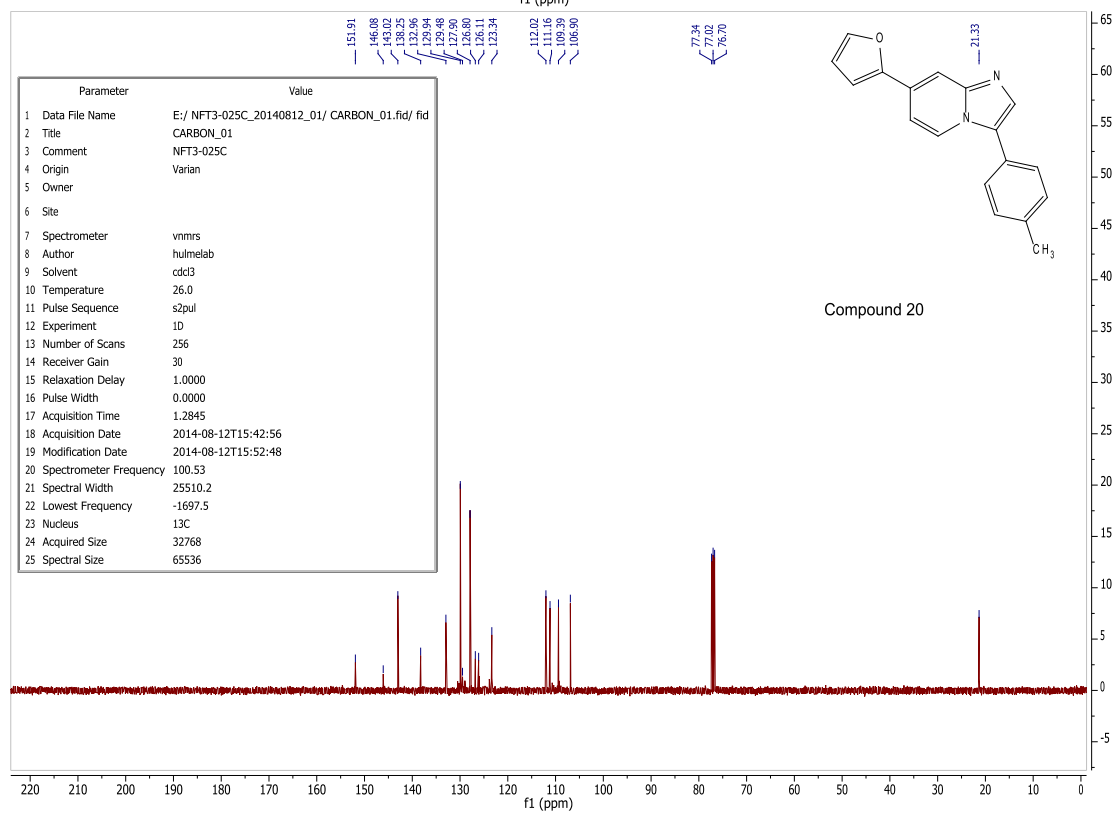



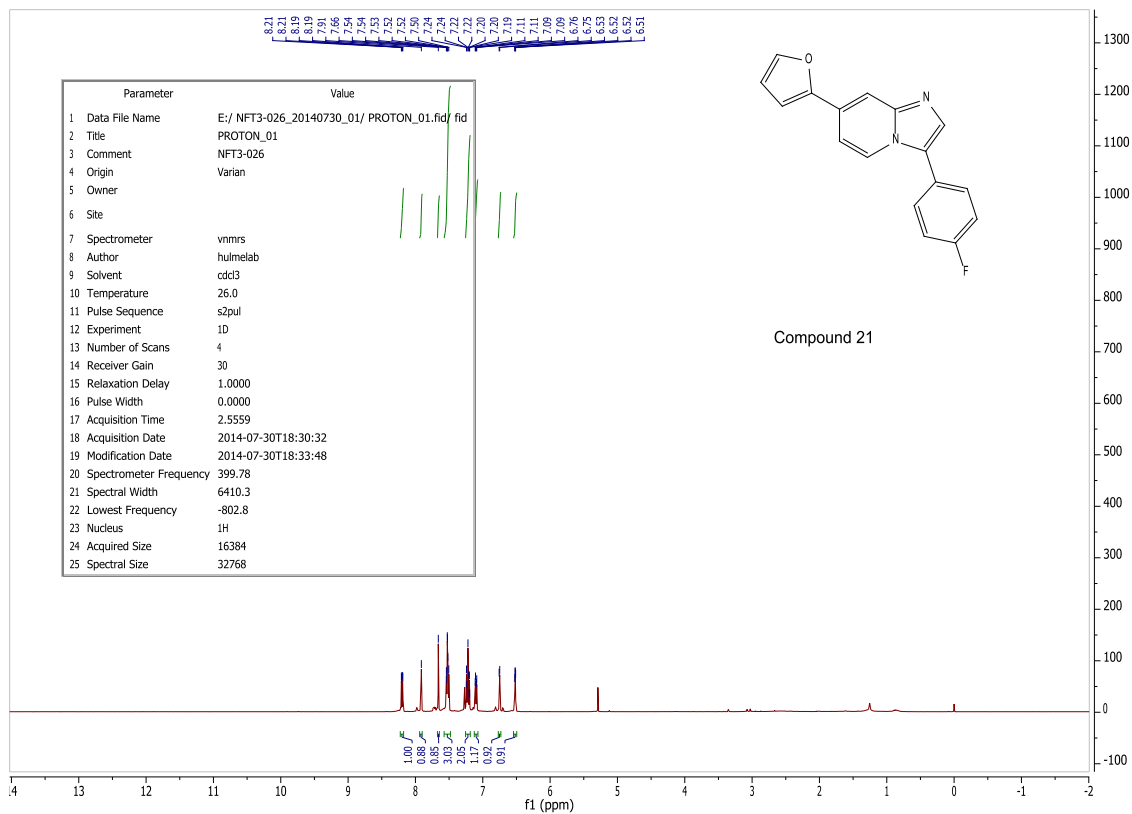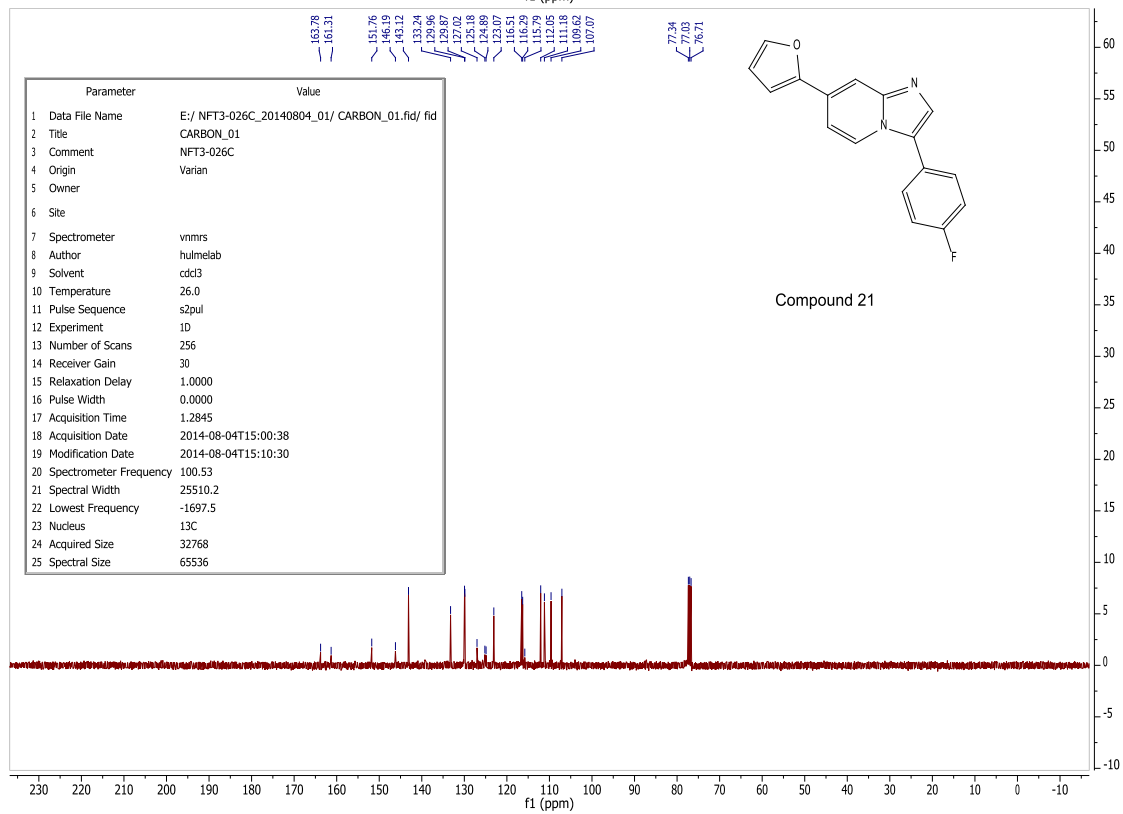

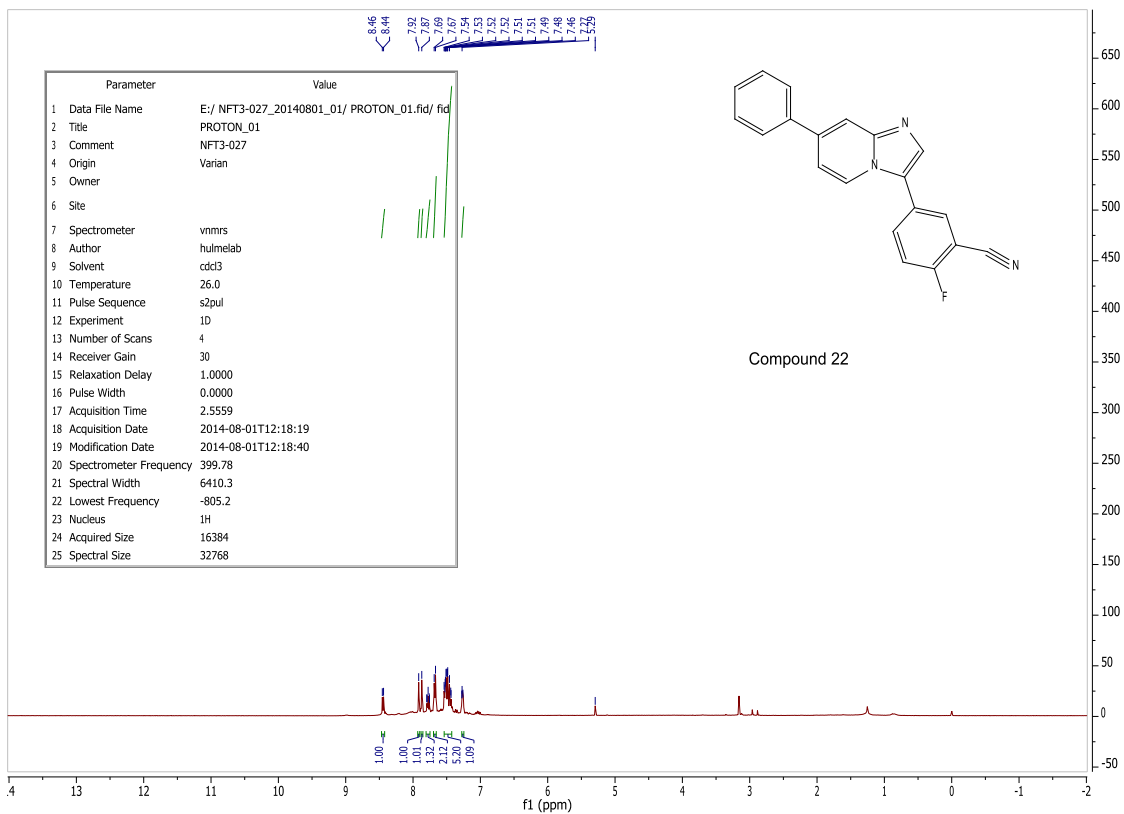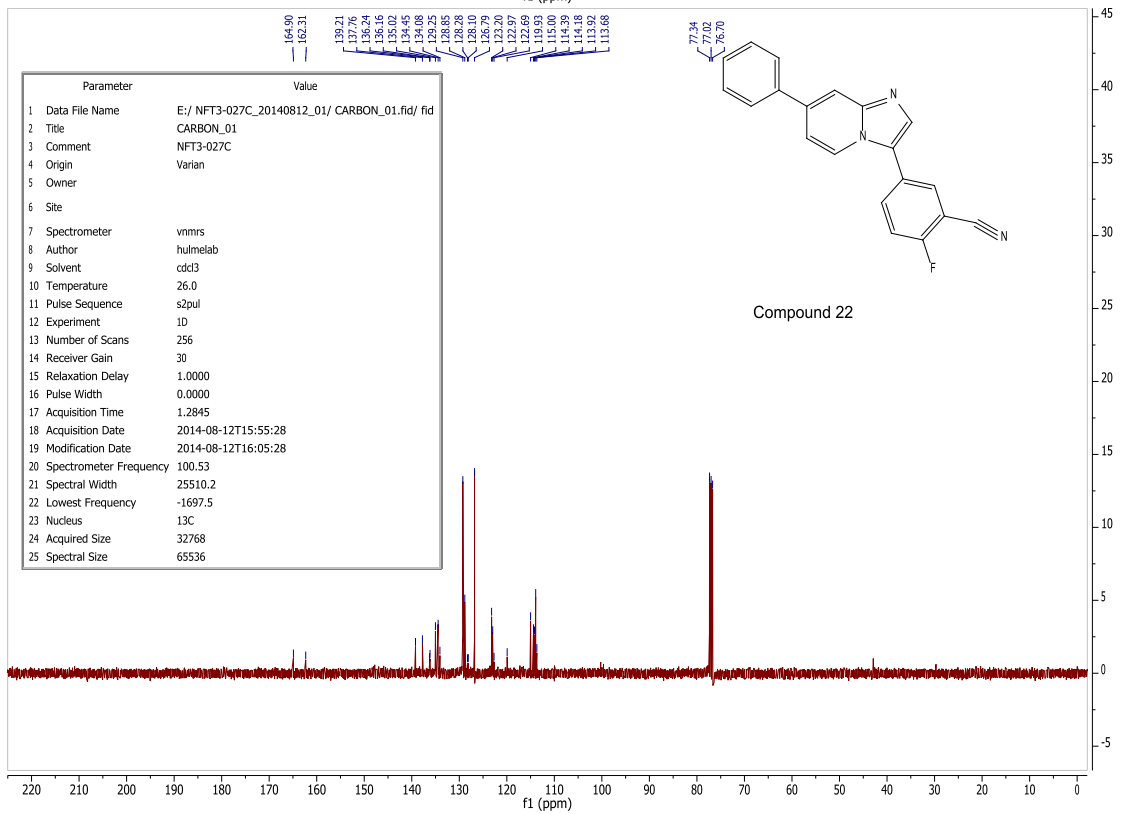

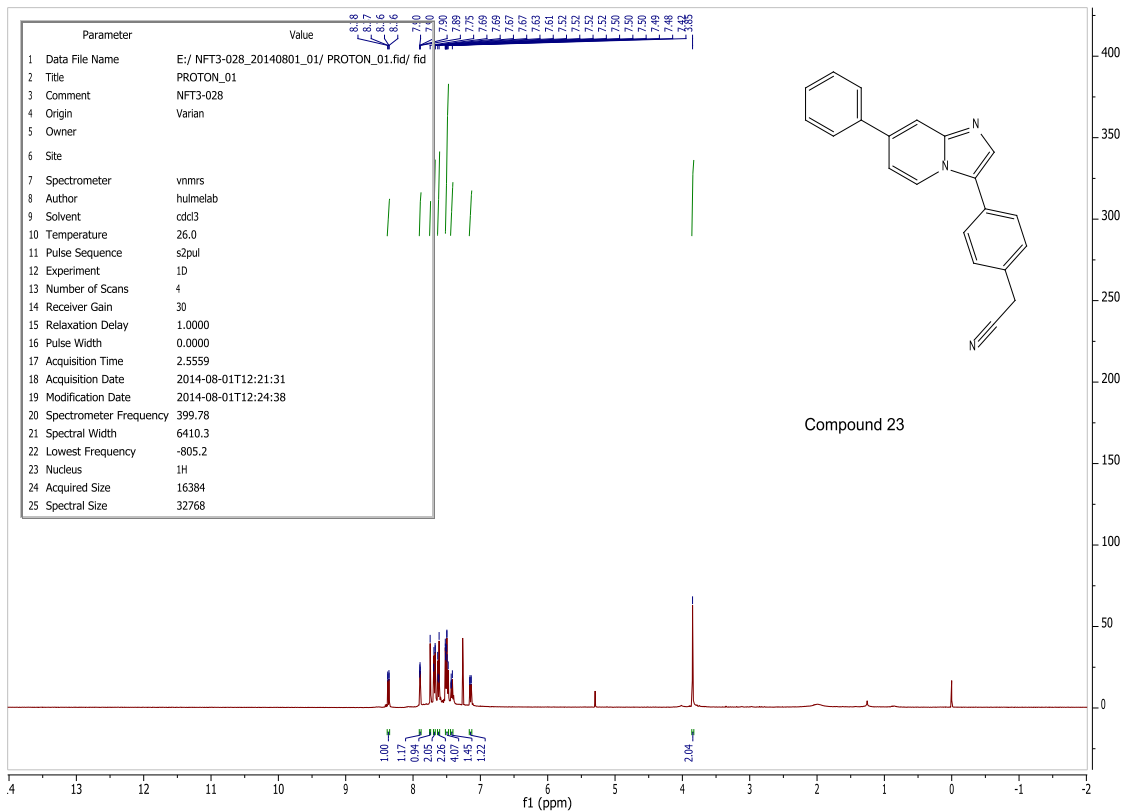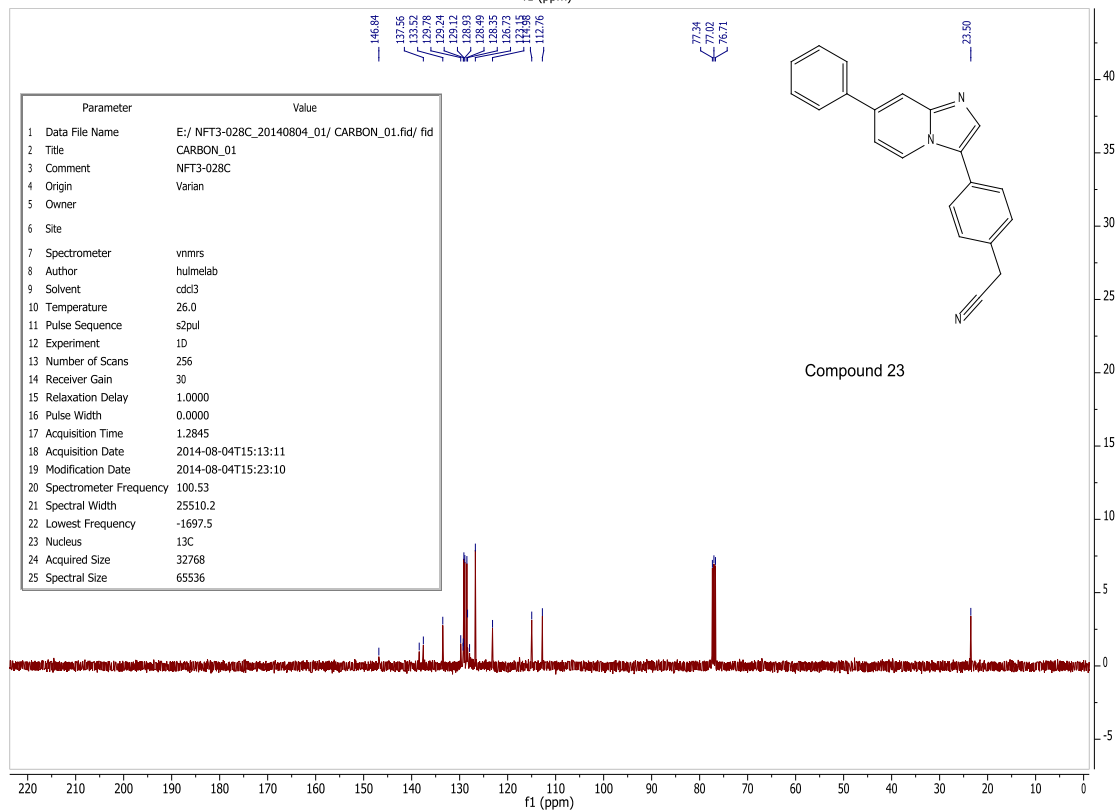

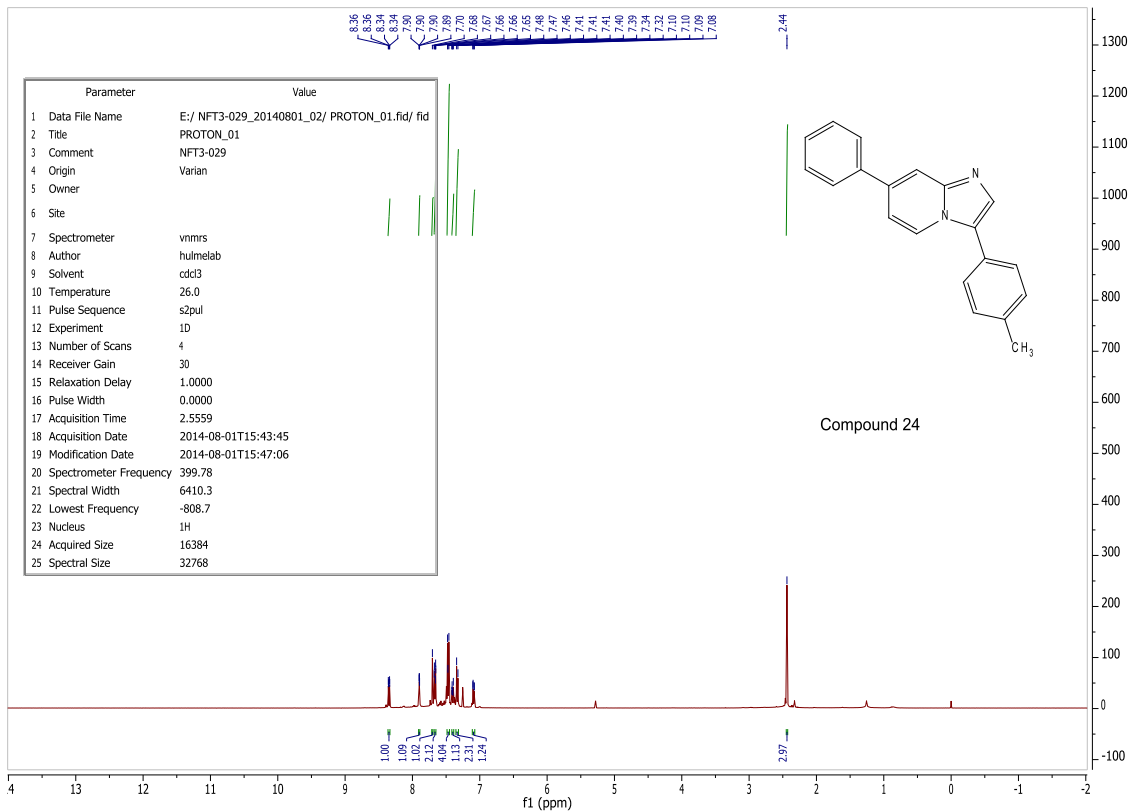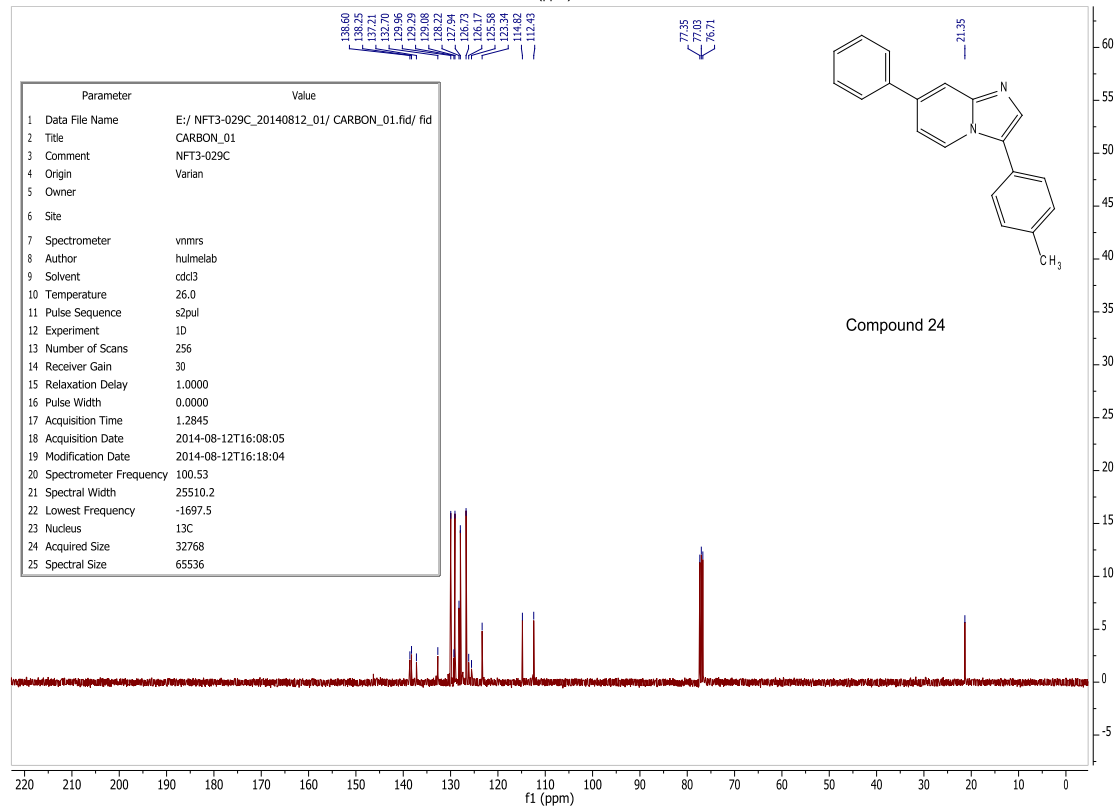

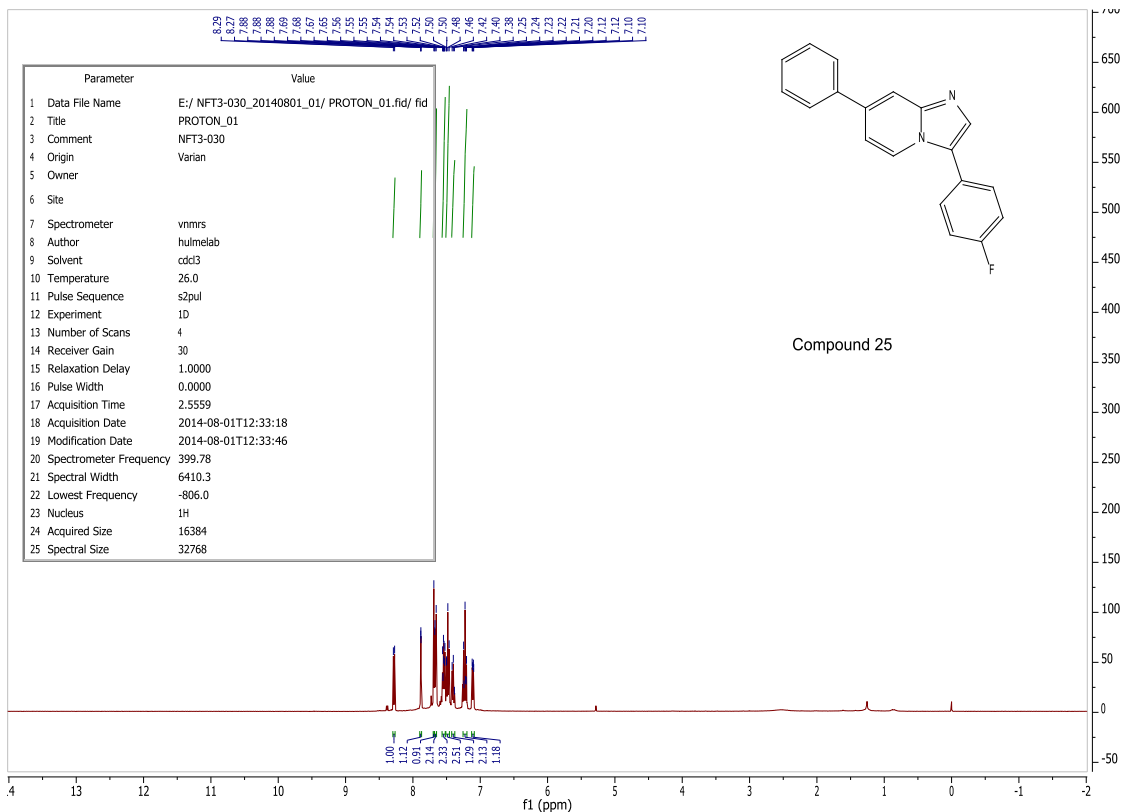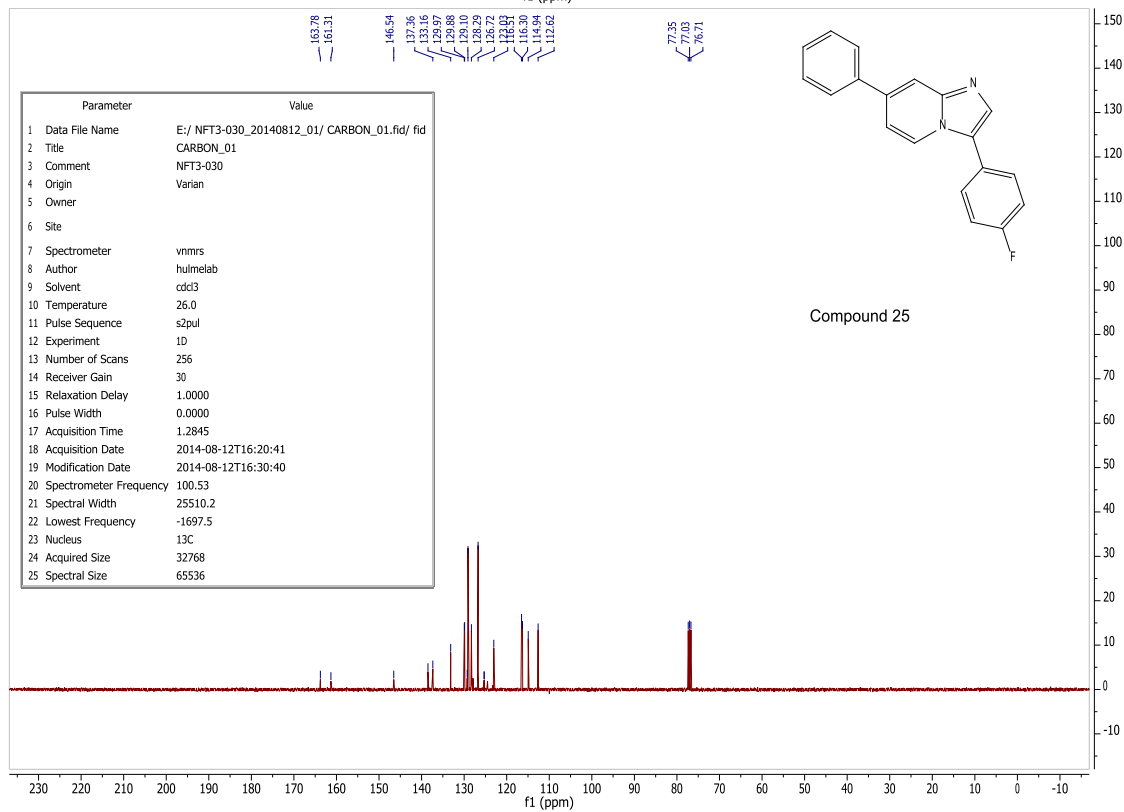

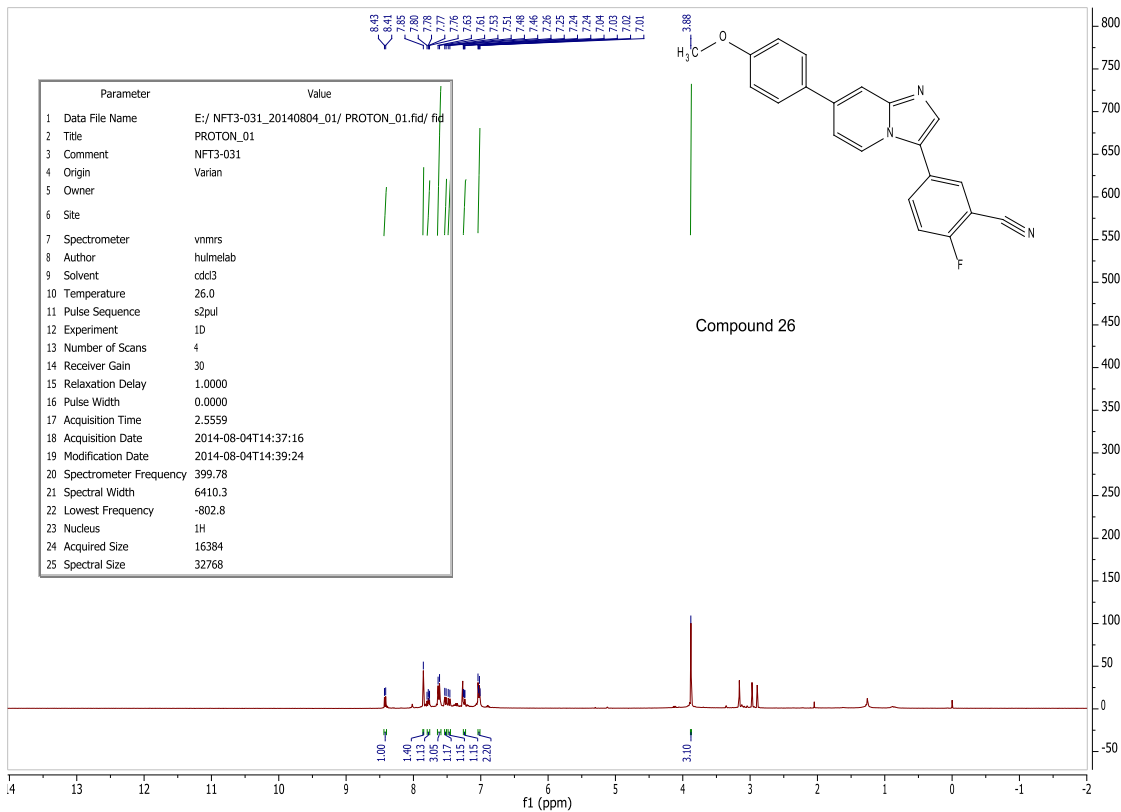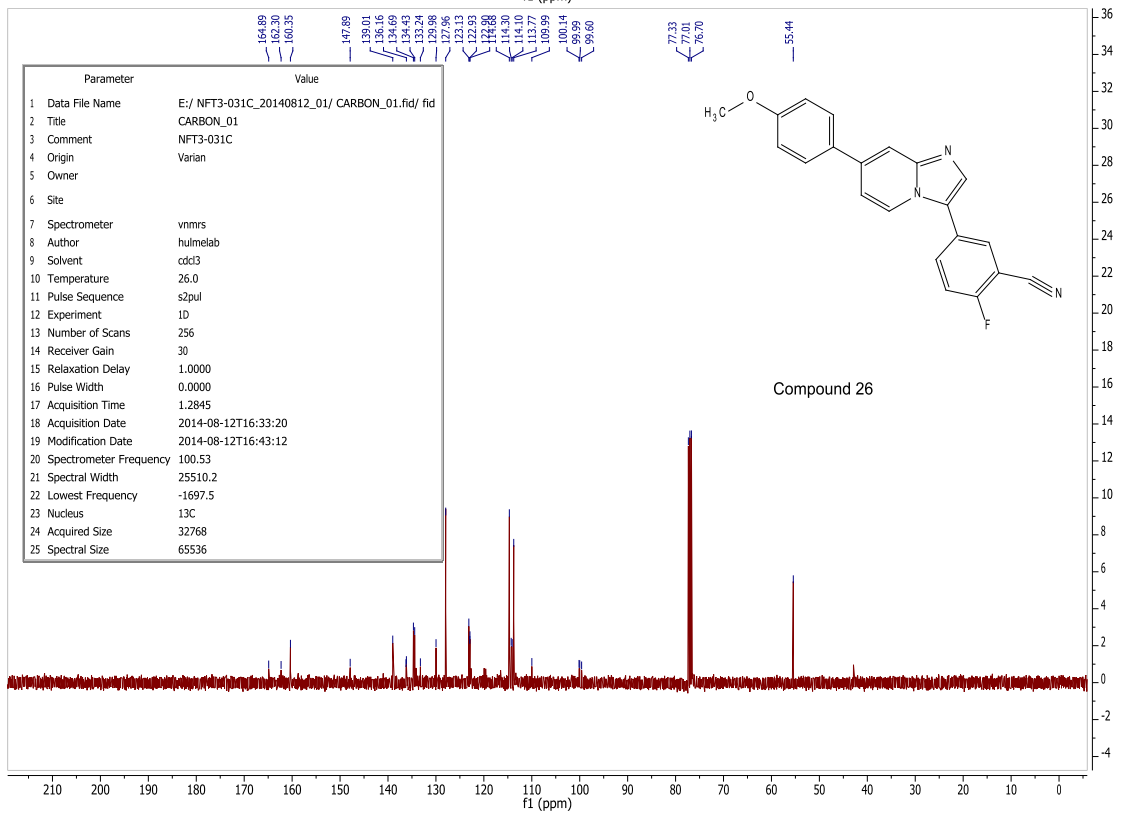

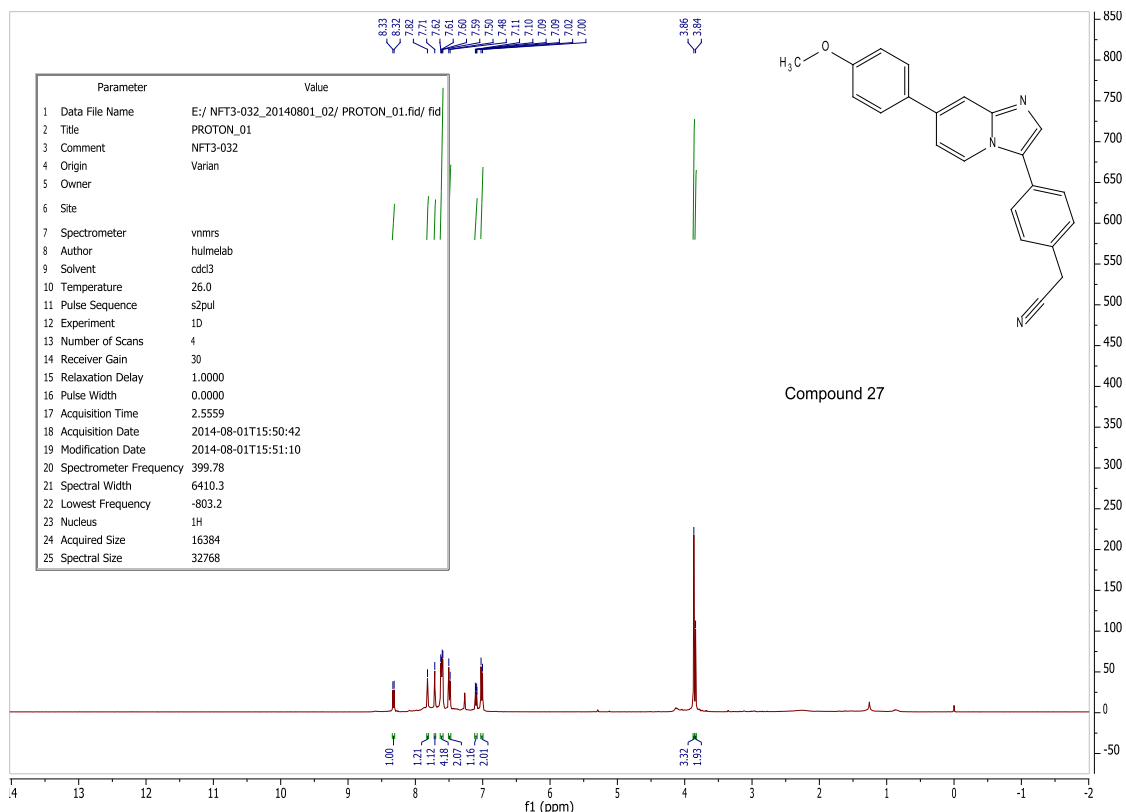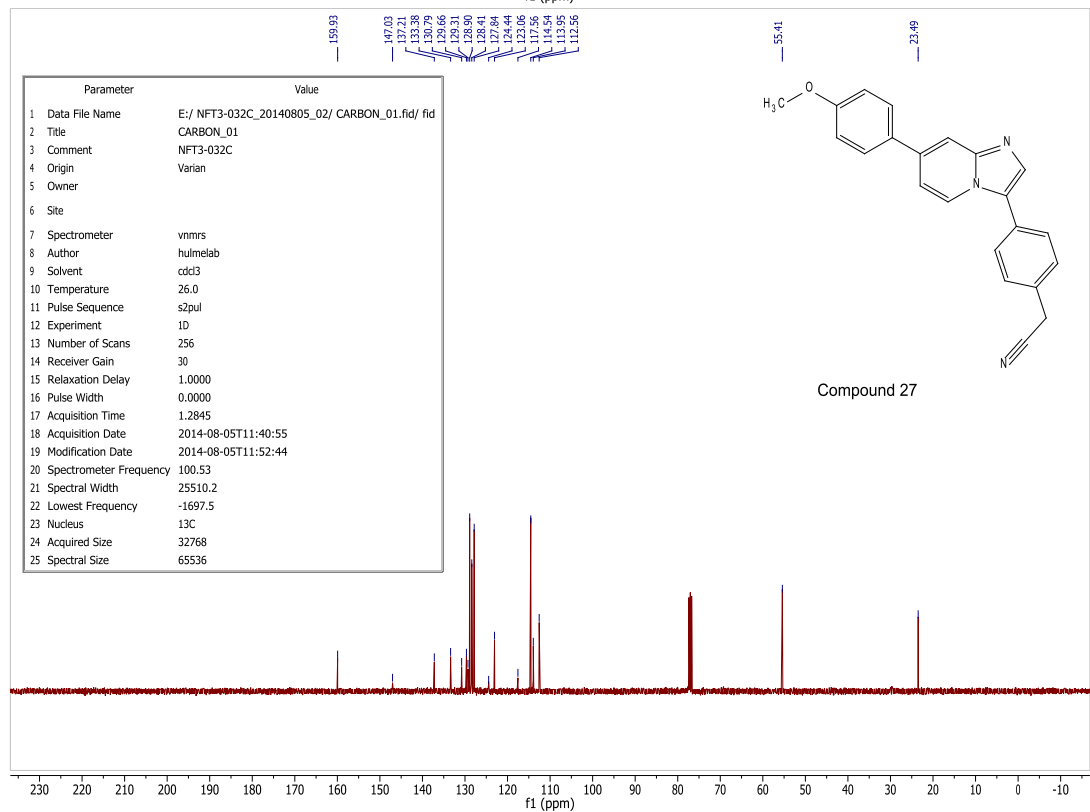

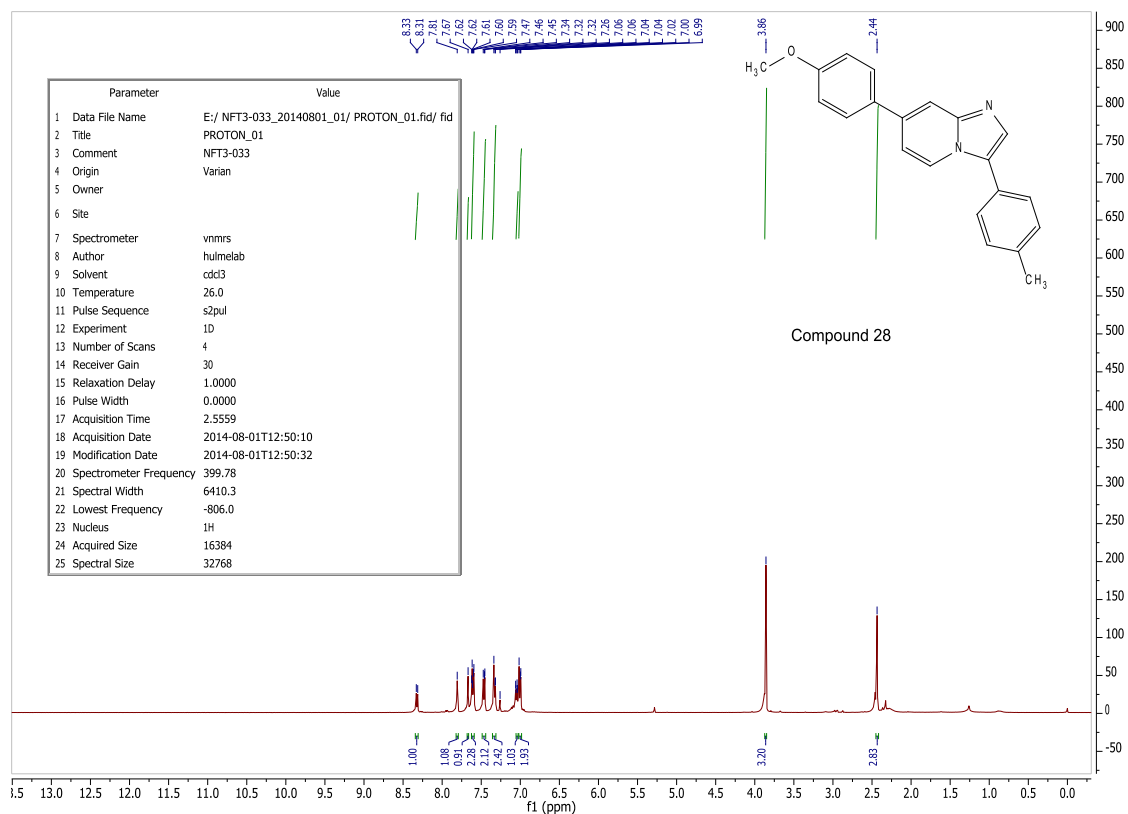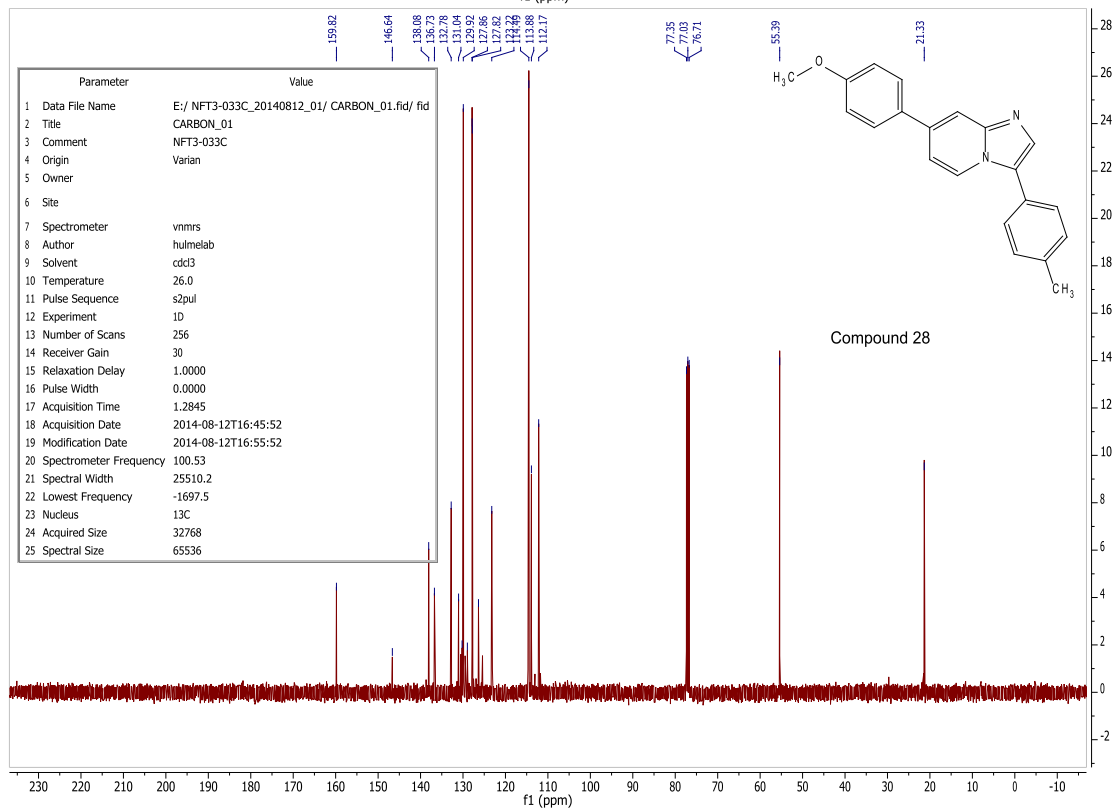



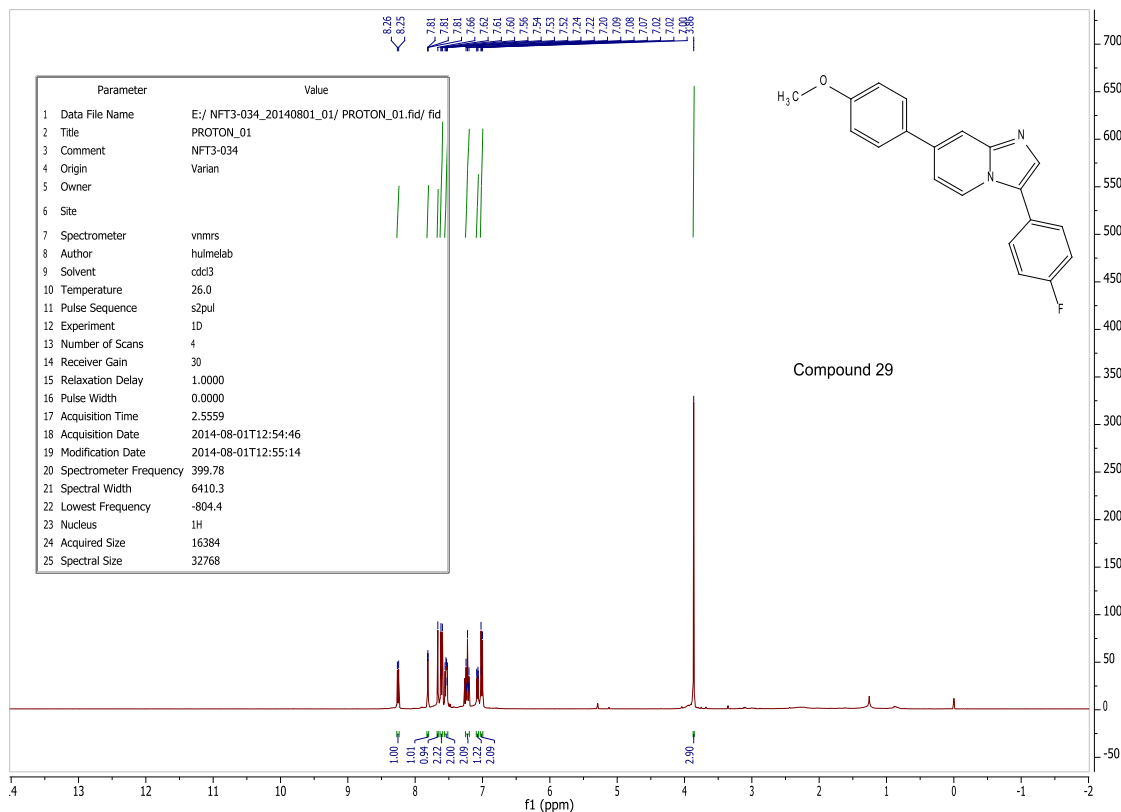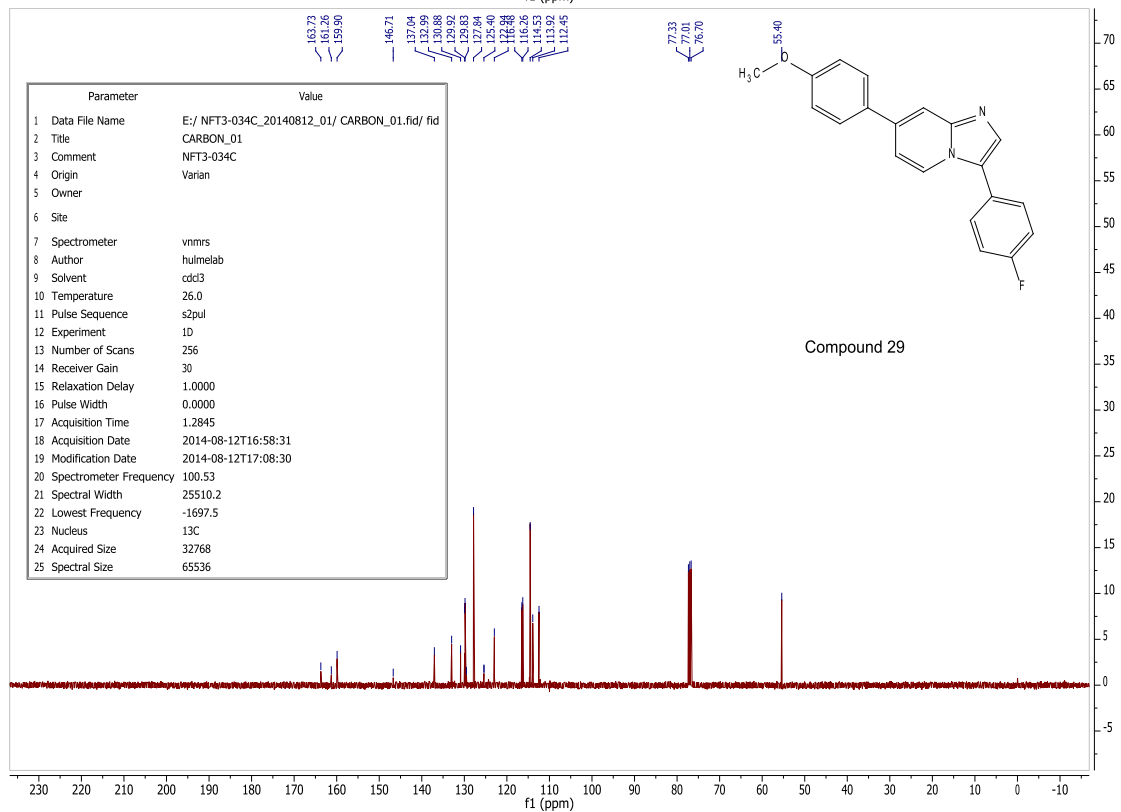

Supplement: NIHMS739079-supplement-Supplemental.pdf [file NIHMS739079-supplement-Supplemental.pdf]
